# Supplementary material for: Highly efficient visible-light-driven reduction of Cr(vi) from water by porphyrin-based metal–organic frameworks: effect of band gap engineering on the photocatalytic activity
Source: Royal Society of Chemistry journal article supplement (doi:10.1039/d0cy00969e), 2020-01-01
Supplement: d0cy00969e1.pdf [file d0cy00969e1.pdf]

# **Highly Efficient Visible-Light-Driven Reduction of Cr(VI) from Water by Porphyrin-Based Metal–Organic Frameworks: Effect of Band Gap Engineering on the Photocatalytic Activity**

Nayuesh Sharma,<sup>1</sup> Arnab Kumar Dey,<sup>1</sup> Rohit Y. Sathe,<sup>1</sup> Ajay Kumar,<sup>2</sup> Venkata Krishnan,<sup>2</sup> T. J. Dhilip Kumar<sup>1</sup> and C. M. Nagaraja\*<sup>1</sup>

<sup>1</sup>Department of Chemistry, Indian Institute of Technology Ropar, Rupnagar 140001, India.

<sup>2</sup>School of Basic Sciences and Advanced Materials Research Center, Indian Institute of Technology Mandi, Kamand, Mandi 175075, Himachal Pradesh, India.

Corresponding author

Email: [cmnraja@iitrpr.ac.in](mailto:cmnraja@iitrpr.ac.in)

## Contents:

### Experimental section

| S. No. | Contents                         | Page No. |
|--------|----------------------------------|----------|
| 1      | (a) Materials                    | S-5      |
| 2      | (b) Physical measurements        | S-5      |
| 3      | (c) Photoelectrochemical studies | S-6      |

### Figures and tables

| S. No. | Figures and tables                                                                                                                                                                                                       | Page No. |
|--------|--------------------------------------------------------------------------------------------------------------------------------------------------------------------------------------------------------------------------|----------|
| 4      | <b>Fig. S1.</b> Powder X-ray diffraction patterns of as-synthesized PCN-222 and PCN-222(M) (Zn <sup>II</sup> , Cu <sup>II</sup> , Ni <sup>II</sup> , Co <sup>II</sup> , Fe <sup>III</sup> Cl, and Mn <sup>III</sup> Cl). | S-7      |
| 5      | <b>Fig. S2.</b> (a) Solid state UV-Vis absorption spectrum and (b) the band gap plot for PCN-222.                                                                                                                        | S-8      |
| 6      | <b>Fig. S3.</b> UV-Vis Spectra of PCN-222 samples                                                                                                                                                                        | S-8      |
| 7      | <b>Fig. S4.</b> Band gap plots for PCN-222 samples.                                                                                                                                                                      | S-9      |
| 8      | <b>Fig. S5.</b> Calibration curve of Cr(VI)- diphenylcarbazide solution.                                                                                                                                                 | S-9      |
| 9      | <b>Fig. S6.</b> Cr(VI) adsorption profiles of PCN-222 MOFs in water at pH 1 in the absence of light.                                                                                                                     | S-10     |
| 10     | <b>Fig. S7.</b> Absorption spectra for photocatalytic reduction of Cr(VI) to Cr(III) catalysed by PCN-222 in the presence of methanol.                                                                                   | S-10     |
| 11     | <b>Fig. S8.</b> Absorption spectra for photocatalytic reduction of Cr(VI) to Cr(III) catalysed by PCN-222 in absence of acid.                                                                                            | S-11     |
| 12     | <b>Fig. S9.</b> Absorption spectra for photocatalytic reduction of Cr(VI) to Cr(III) catalysed by PCN-222 in the absence of light.                                                                                       | S-11     |
| 13     | <b>Fig. S10.</b> Absorption spectra for photocatalytic reduction of Cr(VI) to Cr(III) in absence of PCN-222 catalyst.                                                                                                    | S-12     |
| 14     | <b>Table S1.</b> Comparison of catalytic reduction of Cr(VI) to Cr(III) using various MOFs.                                                                                                                              | S-13     |
| 15     | <b>Fig. S11.</b> Absorption spectra for photocatalytic reduction of Cr(VI) to                                                                                                                                            | S-14     |

|    |                                                                                                                                                                                                                                                                                                                                   |             |
|----|-----------------------------------------------------------------------------------------------------------------------------------------------------------------------------------------------------------------------------------------------------------------------------------------------------------------------------------|-------------|
|    | Cr(III) catalysed by PCN-222(Mn).                                                                                                                                                                                                                                                                                                 |             |
| 16 | <b>Fig. S12.</b> Absorption spectra for photocatalytic reduction of Cr(VI) to Cr(III) catalysed by PCN-222(Fe).                                                                                                                                                                                                                   | <b>S-14</b> |
| 17 | <b>Fig. S13.</b> Absorption spectra for photocatalytic reduction of Cr(VI) to Cr(III) with catalysed by PCN-222(Ni).                                                                                                                                                                                                              | <b>S-15</b> |
| 18 | <b>Fig. S14.</b> Absorption spectra for photocatalytic reduction of Cr(VI) to Cr(III) catalysed by PCN-222(Co).                                                                                                                                                                                                                   | <b>S-15</b> |
| 19 | <b>Fig. S15.</b> Absorption spectra for photocatalytic reduction of Cr(VI) to Cr(III) with catalysed by PCN-222(Cu).                                                                                                                                                                                                              | <b>S-16</b> |
| 20 | <b>Fig. S16.</b> Absorption spectra for photocatalytic reduction of Cr(VI) to Cr(III) with catalysed by PCN-222(Zn).                                                                                                                                                                                                              | <b>S-16</b> |
| 21 | <b>Fig. S17.</b> Histogram showing photocatalytic reduction of Cr(VI) catalysed by PCN-222 and PCN-222(M) (M = Zn <sup>II</sup> , Cu <sup>II</sup> , Ni <sup>II</sup> , Co <sup>II</sup> , Fe <sup>III</sup> Cl, and Mn <sup>III</sup> Cl) within 30 min at pH 1, (b) Time-dependent plot for photocatalytic reduction of Cr(VI). | <b>S-17</b> |
| 22 | <b>Fig. S18.</b> Kinetics of photocatalytic reduction of Cr(VI) catalysed by PCN-222 and PCN-222(M) (M = Zn <sup>II</sup> , Cu <sup>II</sup> , Ni <sup>II</sup> , Co <sup>II</sup> , Fe <sup>III</sup> Cl, and Mn <sup>III</sup> Cl).                                                                                             | <b>S-17</b> |
| 23 | <b>Fig. S19.</b> Histogram showing photocatalytic reduction of Cr(VI) catalysed by PCN-222 and PCN-222(M) (M = Zn <sup>II</sup> , Cu <sup>II</sup> , Ni <sup>II</sup> , Co <sup>II</sup> , Fe <sup>III</sup> Cl, and Mn <sup>III</sup> Cl) within 30 min at pH 2, (b) Time-dependent plot for photocatalytic reduction of Cr(VI). | <b>S-18</b> |
| 24 | <b>Fig. S20.</b> Kinetics of photocatalytic reduction of Cr(VI) catalysed by PCN-222 and PCN-222(M) (M = Zn <sup>II</sup> , Cu <sup>II</sup> , Ni <sup>II</sup> , Co <sup>II</sup> , Fe <sup>III</sup> Cl, and Mn <sup>III</sup> Cl).                                                                                             | <b>S-18</b> |
| 25 | <b>Fig. S21.</b> Histogram showing photocatalytic reduction of Cr(VI) catalysed by PCN-222 and PCN-222(M) (M = Zn <sup>II</sup> , Cu <sup>II</sup> , Ni <sup>II</sup> , Co <sup>II</sup> , Fe <sup>III</sup> Cl, and Mn <sup>III</sup> Cl) within 30 min at pH 2, (b) Time-dependent plot for photocatalytic reduction of Cr(VI). | <b>S-19</b> |
| 26 | <b>Fig. S22.</b> Kinetics of photocatalytic reduction of Cr(VI) catalysed by PCN-222 and PCN-222(M) (M = Zn <sup>II</sup> , Cu <sup>II</sup> , Ni <sup>II</sup> , Co <sup>II</sup> , Fe <sup>III</sup> Cl, and Mn <sup>III</sup> Cl).                                                                                             | <b>S-19</b> |
| 27 | <b>Fig. S23.</b> Histogram showing photocatalytic reduction of Cr(VI)                                                                                                                                                                                                                                                             | <b>S-20</b> |

|    |                                                                                                                                                                                                                                                                                                                                                          |      |
|----|----------------------------------------------------------------------------------------------------------------------------------------------------------------------------------------------------------------------------------------------------------------------------------------------------------------------------------------------------------|------|
|    | catalysed by PCN-222 and PCN-222(M) (M = Zn <sup>II</sup> , Cu <sup>II</sup> , Ni <sup>II</sup> , Co <sup>II</sup> , Fe <sup>III</sup> Cl, and Mn <sup>III</sup> Cl) within 30 min at pH 2, (b) Time-dependent plot for photocatalytic reduction of Cr(VI).                                                                                              |      |
| 28 | <b>Fig. S24.</b> Kinetics of photocatalytic reduction of Cr(VI) catalysed by PCN-222 and PCN-222(M) (M = Zn <sup>II</sup> , Cu <sup>II</sup> , Ni <sup>II</sup> , Co <sup>II</sup> , Fe <sup>III</sup> Cl, and Mn <sup>III</sup> Cl).                                                                                                                    | S-20 |
| 29 | <b>Table. S2.</b> Comparison of catalytic reduction of Cr(VI) to Cr(III) using PCN-222 frameworks.                                                                                                                                                                                                                                                       | S-21 |
| 30 | <b>Fig. S25.</b> Absorption spectra for photocatalytic reduction of Cr(VI) to Cr(III) catalysed by PCN-222 in tap water.                                                                                                                                                                                                                                 | S-22 |
| 31 | <b>Fig. S26.</b> Absorption spectra for photocatalytic reduction of Cr(VI) to Cr(III) with catalysed by PCN-222 in river water.                                                                                                                                                                                                                          | S-22 |
| 32 | <b>Fig. S27.</b> (a) Photocatalytic reduction of Cr(VI) to Cr(III) carried out in deionized water, tap water, and river water (b) the percentage photocatalytic reduction of Cr(VI) within 25 min.                                                                                                                                                       | S-23 |
| 33 | <b>Fig. S28.</b> (a) Concentration-dependent adsorption of Cr(VI) by PCN-222 and PCN-222(M) (M = Zn <sup>II</sup> , Cu <sup>II</sup> , Ni <sup>II</sup> , Co <sup>II</sup> , Fe <sup>III</sup> Cl, and Mn <sup>III</sup> Cl) carried out under dark conditions. (b) time-dependent adsorption of Cr(VI) carried out with 40 ppm concentration of Cr(VI). | S-23 |
| 34 | <b>Fig. S29.</b> Percentage photo-reduction of Cr(VI) catalysed by PCN-222 and H <sub>2</sub> TCPP ligand.                                                                                                                                                                                                                                               | S-24 |
| 35 | <b>Fig. S30.</b> Fluorescence spectra of H <sub>2</sub> TCPP ligand and PCN-222 MOF.                                                                                                                                                                                                                                                                     | S-25 |
| 36 | <b>Fig. S31.</b> Time-resolved fluorescence spectra for H <sub>2</sub> TCPP ligand and PCN-222 MOF recorded with excitation wavelength of 440 nm in water.                                                                                                                                                                                               | S-25 |
| 37 | <b>Table S3.</b> Decay parameters of samples recorded in water with excitation wavelength of 440 nm.                                                                                                                                                                                                                                                     | S-26 |
| 38 | <b>Fig. S32.</b> Optimized structure of H <sub>2</sub> TCPP, H <sub>3</sub> TCPP <sup>+</sup> , and H <sub>4</sub> TCPP <sup>+2</sup> . Here, white: hydrogen, grey: carbon, blue: nitrogen, red: oxygen.                                                                                                                                                | S-26 |
| 39 | <b>Fig. S33.</b> Optimized structures of porphyrin metal complexes.                                                                                                                                                                                                                                                                                      | S-27 |
| 40 | <b>Fig. S34.</b> Bandgaps of optimized FeCl-TCPP and MnCl-TCPP structures.                                                                                                                                                                                                                                                                               | S-27 |

|           |                                                                                                                                                                                                                                          |             |
|-----------|------------------------------------------------------------------------------------------------------------------------------------------------------------------------------------------------------------------------------------------|-------------|
| <b>41</b> | <b>Fig. S35.</b> Solid state UV-vis absorption spectrum of as synthesized PCN-222 and the isolated sample after soaking in dilute H <sub>2</sub> SO <sub>4</sub> (pH 1), (b) band gap plot for protonated PCN-222 after treated at pH 1. | <b>S-28</b> |
| <b>42</b> | <b>Fig. S36.</b> PXRD patterns of PCN-222,(a) as-synthesized sample (b) recycled sample after catalysis.                                                                                                                                 | <b>S-28</b> |
| <b>43</b> | <b>Fig. S37.</b> UV-Vis spectra of (a) as synthesized PCN-222 and (b) recycled sample after catalysis.                                                                                                                                   | <b>S-29</b> |
| <b>44</b> | <b>Fig. S38.</b> FT-IR spectra of (a) as synthesized PCN-222 and (b) recycled sample after catalysis.                                                                                                                                    | <b>S-29</b> |

## Experimental section

### Materials

All reagents and solvents were purchased from commercial sources and used without further purification. ZrCl<sub>4</sub>.8H<sub>2</sub>O (98%), and pyrrole (98%) were obtained from Sigma-Aldrich Chemicals. Propionic acid (99%) was received from TCI Chemicals. H<sub>2</sub>TCPP ligand was prepared by following the previously reported literature procedure with modification and characterized.<sup>1</sup> PCN-222 was synthesized following the reported procedure<sup>2</sup> and the phase purity of the compound was identified by PXRD analysis, UV-Vis and FTIR spectroscopy.

### Physical measurements

Powder X-ray powder diffraction (PXRD) patterns were collected on a PANalytical X'PERT PRO diffractometer using Cu-K<sub>α</sub> radiation ( $\lambda = 1.542 \text{ \AA}$ ; 40 kV, 20 mA). pH of the solutions were measured using Mettler Toledo pH meter. UV-vis spectra were recorded on Shimadzu UV-2600 240 V spectrophotometer. Fluorescence spectra of the samples dispersed in water were recorded on a Perkin Elmer LS55 fluorescence spectrophotometer at room temperature.

Time resolved fluorescence measurements of all samples dispersed in water were recorded on Flurocube; Horiba Jobin-Yvin, NJ at room temperature.

### **Photoelectrochemical studies**

The photoelectrochemical measurements were performed in a three-electrode photoelectrochemical (PEC) cell, a scanning potentiostat (Metrohm, Autolab). For this 2.5 mg of the photocatalyst was dispersed in 500  $\mu\text{L}$  ethanol and 20  $\mu\text{L}$  of Nafion (0.25%) solution was added for preparing the working electrode. The mixture was sonicated for 10 minutes and drop-casted on to an indium doped tin oxide (ITO) glass substrate with 2 X 3.5  $\text{cm}^2$  area. A calomel electrode and a platinum wire were used as reference and counter electrodes, respectively. In addition to this, 0.1 M  $\text{Na}_2\text{SO}_4$  solution was prepared and the pH of solution was adjusted to 1 by adding few drops of  $\text{H}_2\text{SO}_4$  used as electrolyte. A visible light emitting CFL bulb (45 W) was used as the incident light source and placed at 10 cm distance from the electrochemical cell. The photoelectrochemical (PEC) studies of the photocatalysts were performed by measuring photocurrent density in dark and under visible light irradiation. All the samples were quite stable in 0.1 M  $\text{Na}_2\text{SO}_4$  electrolytic solution at pH 1.

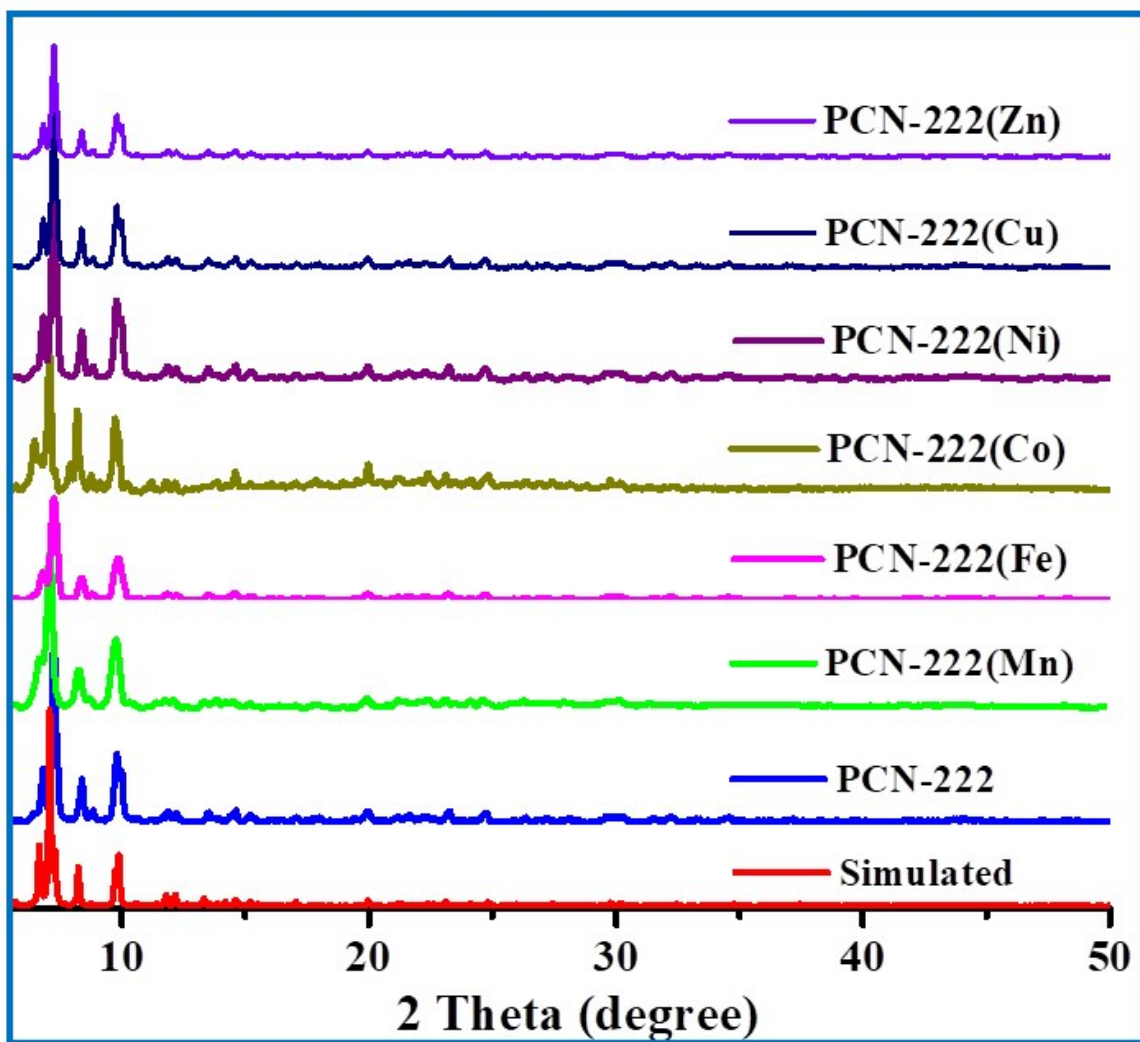

**Fig. S1** Powder X-ray diffraction pattern of as-synthesized PCN-222 and PCN-222(M) ( $\text{Zn}^{\text{II}}$ ,  $\text{Cu}^{\text{II}}$ ,  $\text{Ni}^{\text{II}}$ ,  $\text{Co}^{\text{II}}$ ,  $\text{Fe}^{\text{III}}\text{Cl}$ , and  $\text{Mn}^{\text{III}}\text{Cl}$ ).

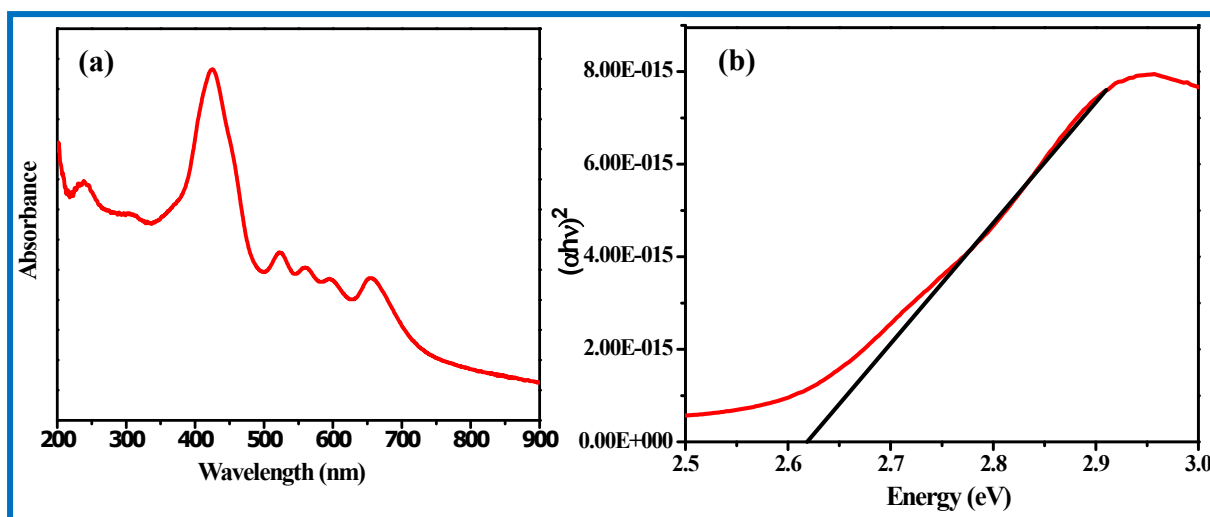

**Fig. S2** (a) Solid state UV-Vis absorption spectrum and (b) band gap plot for PCN-222.

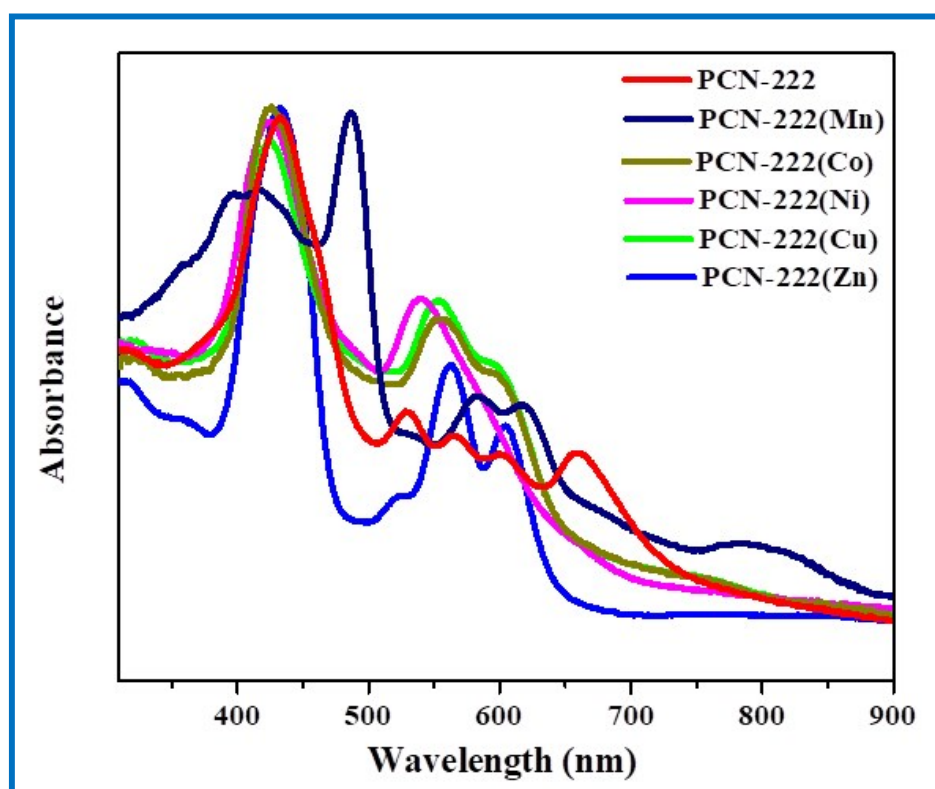

**Fig. S3** UV-Vis spectra of PCN-222 and PCN-222(M) ( $\text{Zn}^{\text{II}}$ ,  $\text{Cu}^{\text{II}}$ ,  $\text{Ni}^{\text{II}}$ ,  $\text{Co}^{\text{II}}$ , and  $\text{Mn}^{\text{III}}\text{Cl}$ ) MOFs.



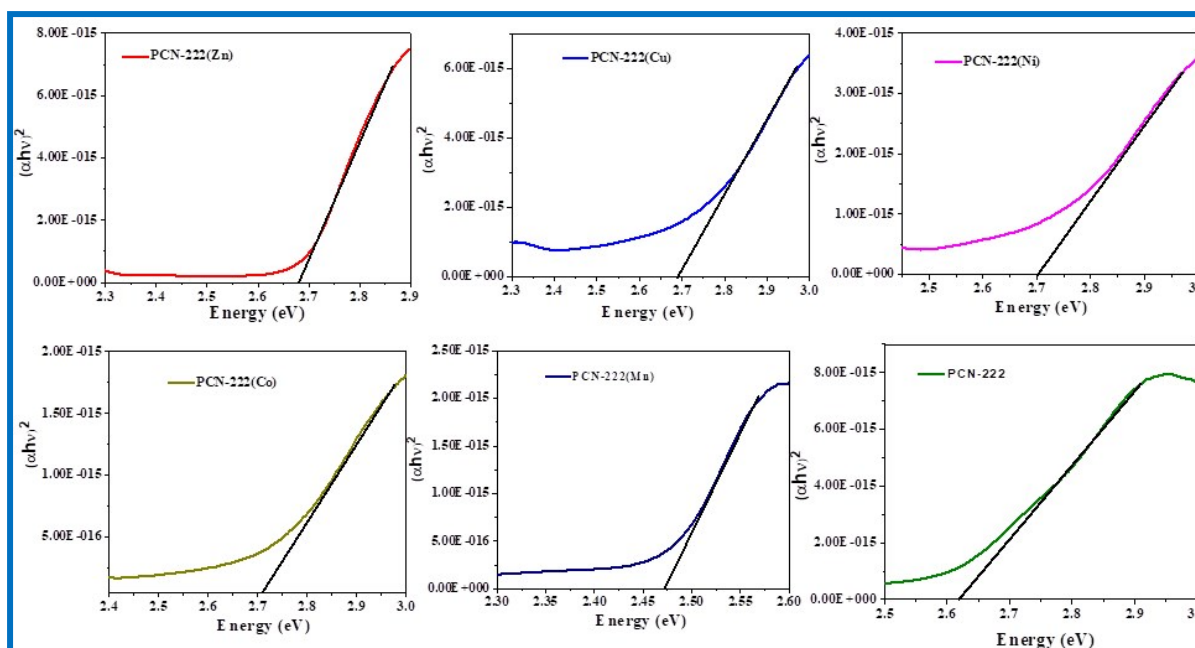

Fig. S4 Bandgap plots for PCN-222 and PCN-222(M) (Zn<sup>II</sup>, Cu<sup>II</sup>, Ni<sup>II</sup>, Co<sup>II</sup> and Mn<sup>III</sup>Cl) MOFs.

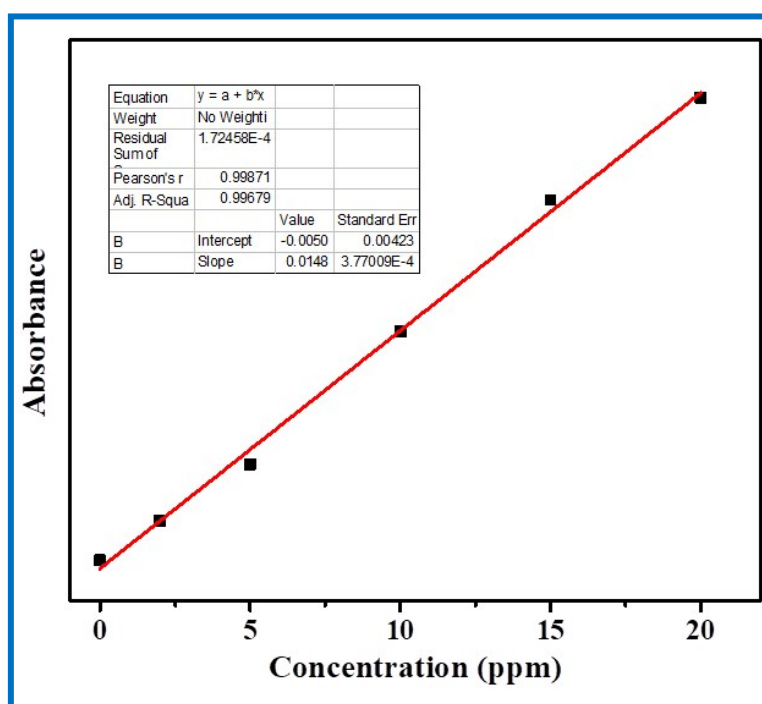

Fig. S5 Calibration curve of Cr(VI)-diphenylcarbazide solution.

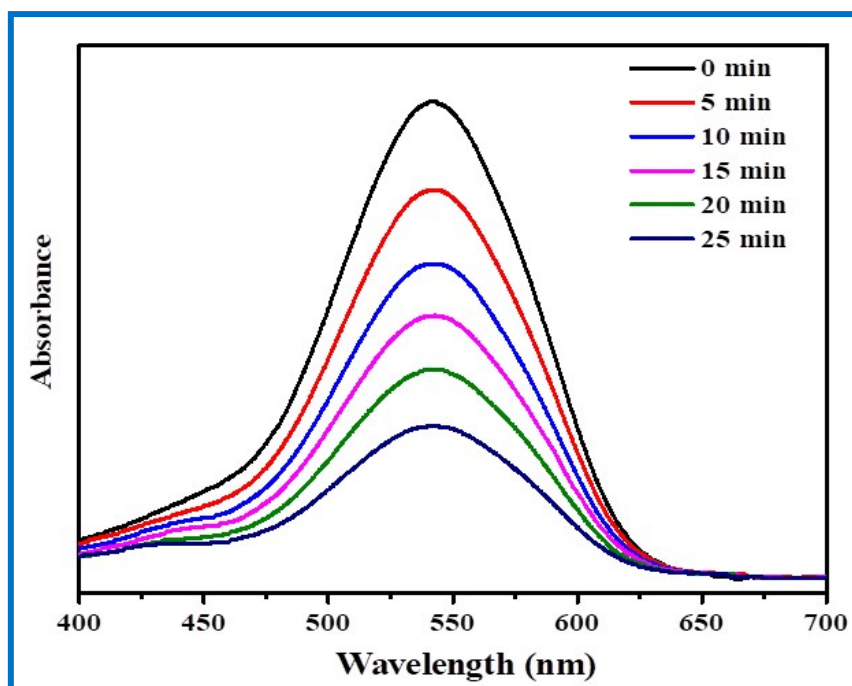

**Fig. S6** Absorption spectra for photocatalytic reduction of Cr(VI) to Cr(III) catalysed by PCN-222 in the absence of methanol.

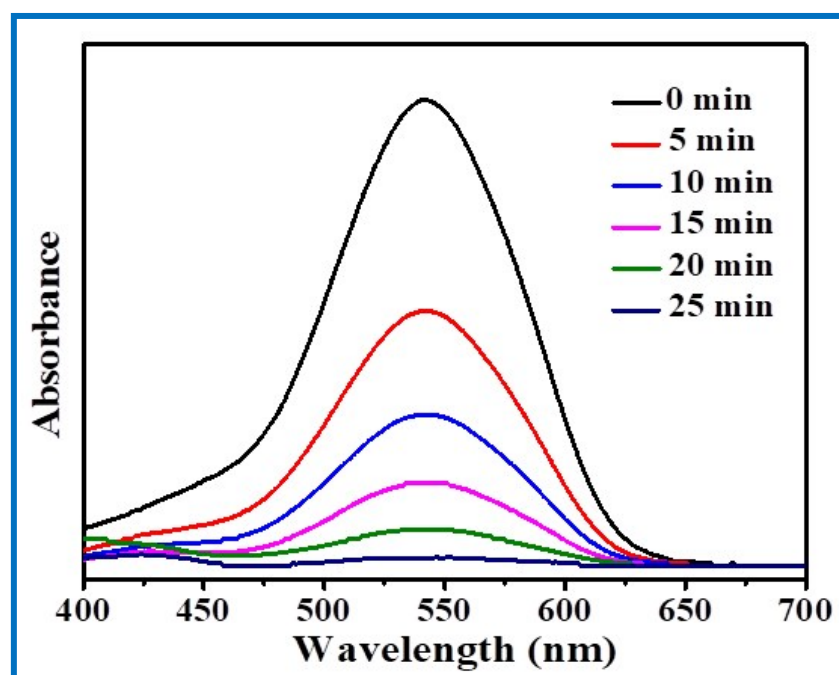

**Fig. S7** Absorption spectra for photocatalytic reduction of Cr(VI) to Cr(III) catalysed by PCN-222 in the presence of methanol.

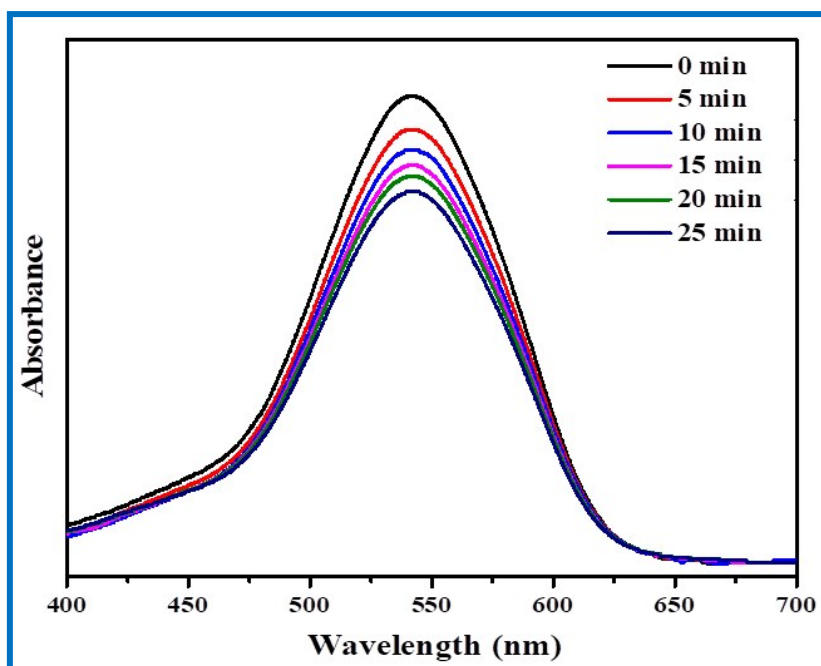

**Fig. S8** Absorption spectra for photocatalytic reduction of Cr(VI) to Cr(III) catalysed by PCN-222 in the absence of acid.

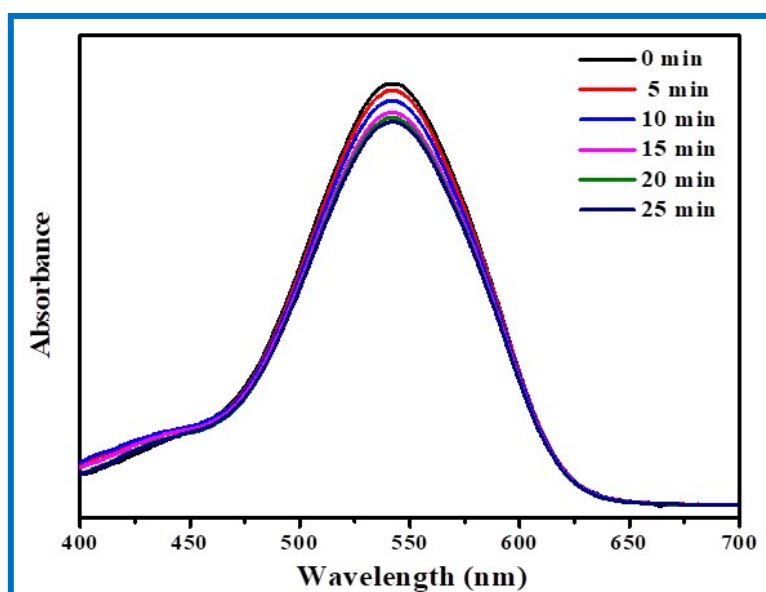

**Fig. S9** Absorption spectra for photocatalytic reduction of Cr(VI) to Cr(III) catalysed by PCN-222 in the absence of light.

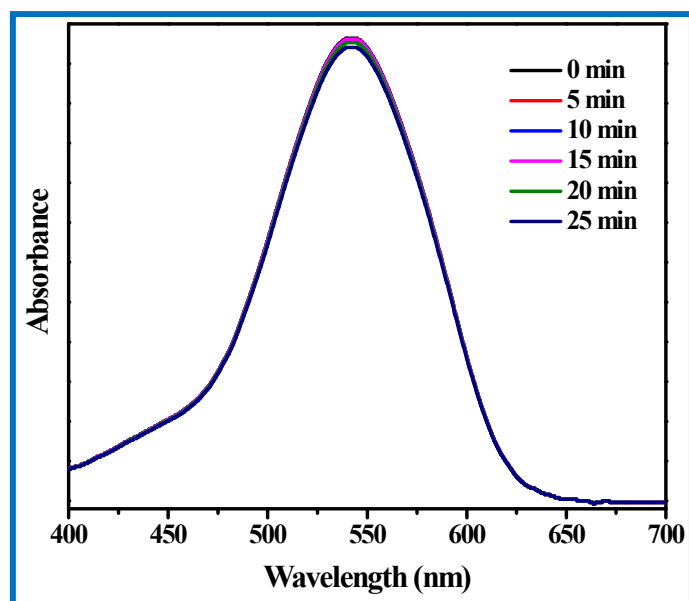

**Fig. S10** Absorption spectra for photocatalytic reduction of Cr(VI) to Cr(III) in the absence of PCN-222 catalyst.

**Table S1.** Comparison of catalytic efficiency for reduction of Cr(VI) to Cr(III) reported for various MOFs<sup>3</sup>

| S.No.     | Catalysts                                                                               | Catalyst amount (mg) | Cr(VI) concentration (ppm) | Efficiency               | pH       | $k$ (min <sup>-1</sup> ) | References          |
|-----------|-----------------------------------------------------------------------------------------|----------------------|----------------------------|--------------------------|----------|--------------------------|---------------------|
| 1         | Pd@UiO-66(NH <sub>2</sub> )                                                             | 20                   | 10                         | 99 % in 90 min           | 2        | -                        | 3a                  |
| 2         | UiO-66(NH <sub>2</sub> )                                                                | 20                   | 10                         | 97 % in 80 min           | 2        | -                        | 3b                  |
| 3         | g-C <sub>3</sub> N <sub>4</sub> /MIL-53(Fe)                                             | 20                   | 10                         | 100 % in 180 min         | 2        | 0.0191                   | 3c                  |
| 4         | NNU-36                                                                                  | 15                   | 10                         | 95.3% in 60 min          | 2.17     | 0.0471                   | 3d                  |
| 5         | NH <sub>2</sub> -Fe(III)MIL-88B                                                         | 20                   | 8                          | 100 % in 45 min          | 2        | -                        | 3e                  |
| 6         | [Cd(4Hptz) <sub>2</sub> ·(H <sub>2</sub> O) <sub>2</sub> Cl <sub>2</sub> ] <sub>n</sub> | 7                    | 10                         | 100 % in 50 min          | 3        | 0.0481                   | 3f                  |
| 7         | [Cu(bttx) <sub>2</sub> (ClO <sub>4</sub> ) <sub>2</sub> ] <sub>n</sub>                  | 7                    | 10                         | 92.17 % in 70 min        | 3        | 0.0295                   | 3f                  |
| 8         | [Cu(bttx)(ClO <sub>4</sub> )] <sub>n</sub>                                              | 7                    | 10                         | 82.92 % in 60 min        | 3        | 0.0217                   | 3f                  |
| 9         | [Cu <sub>2</sub> I <sub>2</sub> (BPEA)](DMF) <sub>4</sub>                               | 15                   | 10                         | 95 % in 10 min           | 2.23     | -                        | 3g                  |
| <b>10</b> | <b>PCN-222</b>                                                                          | <b>5</b>             | <b>10</b>                  | <b>93 % in 30 min</b>    | <b>2</b> | <b>0.0941</b>            | <b>Present work</b> |
| <b>11</b> | <b>PCN-222</b>                                                                          | <b>5</b>             | <b>20</b>                  | <b>97.75 % in 60 min</b> | <b>2</b> | <b>0.0598</b>            | <b>Present work</b> |
| <b>12</b> | <b>PCN-222</b>                                                                          | <b>5</b>             | <b>20</b>                  | <b>100% in 25 min</b>    | <b>1</b> | <b>0.1289</b>            | <b>Present work</b> |

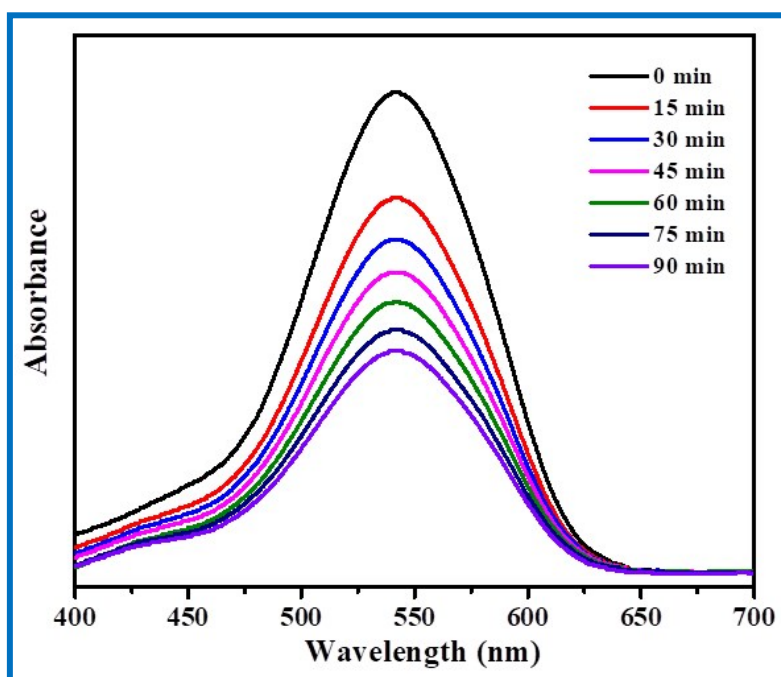

**Fig. S11** Absorption spectra for photocatalytic reduction of Cr(VI) to Cr(III) catalysed by PCN-222(Mn).

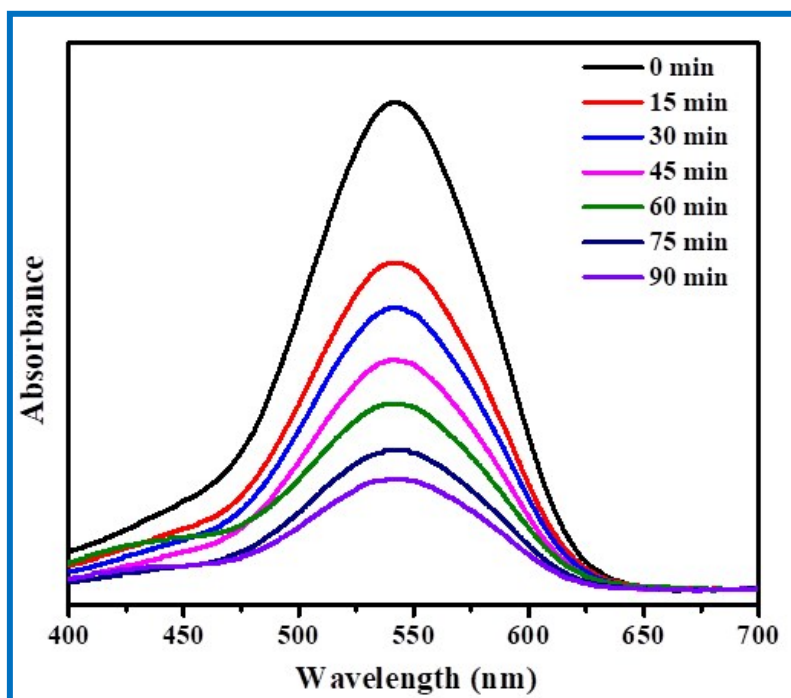

**Fig. S12** Absorption spectra for photocatalytic reduction of Cr(VI) to Cr(III) catalysed by PCN-222(Fe).

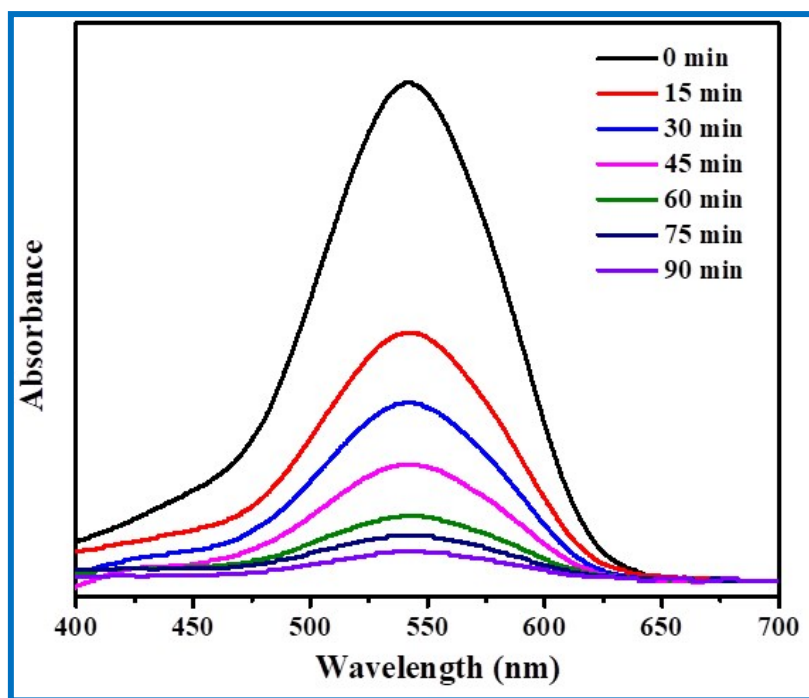

**Fig. S13** Absorption spectra for photocatalytic reduction of Cr(VI) to Cr(III) catalysed by PCN-222(Ni).

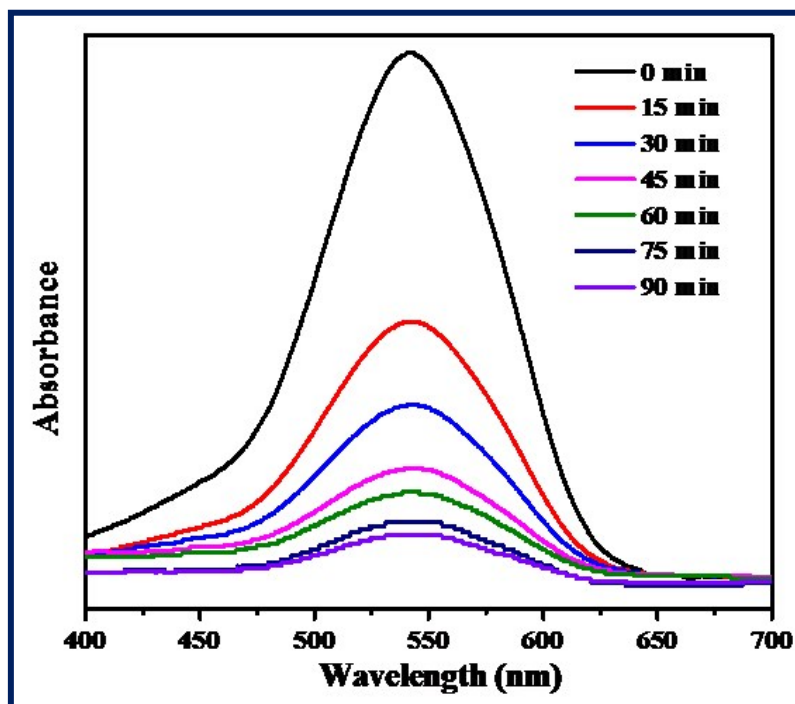

**Fig. S14** Absorption spectra for photocatalytic reduction of Cr(VI) to Cr(III) catalysed by PCN-222(Co).

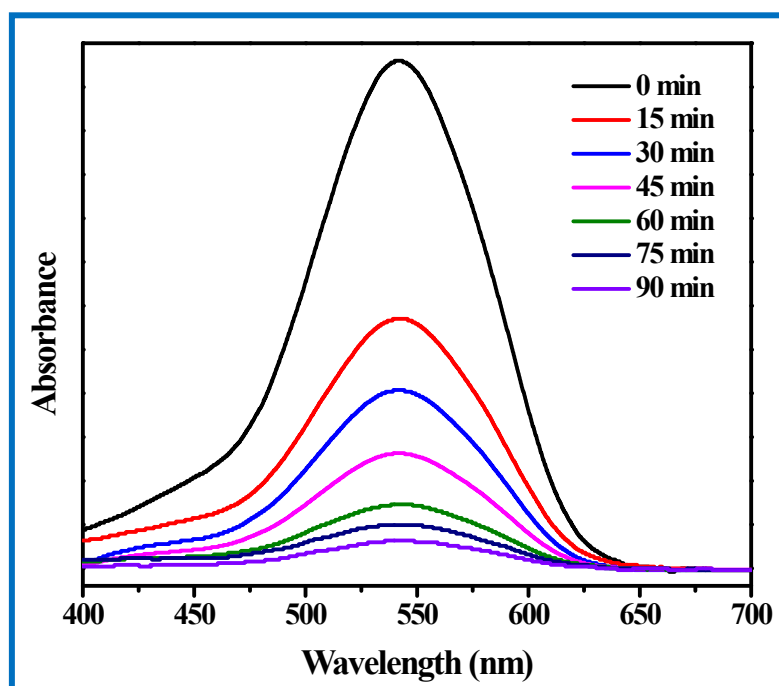

**Fig. S15** Absorption spectra for photocatalytic reduction of Cr(VI) to Cr(III) catalysed by PCN-222(Cu).

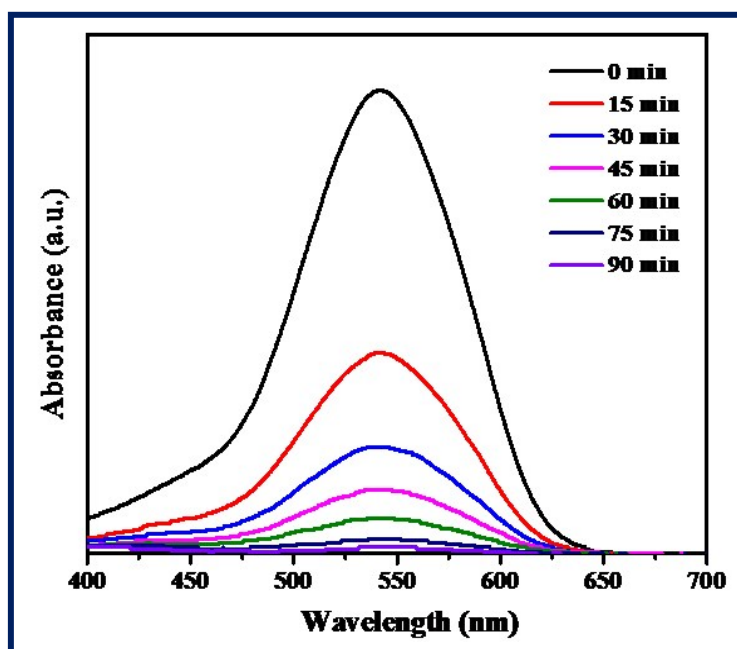

**Fig. S16** Absorption spectra for photocatalytic reduction of Cr(VI) to Cr(III) catalysed by PCN-222(Zn).



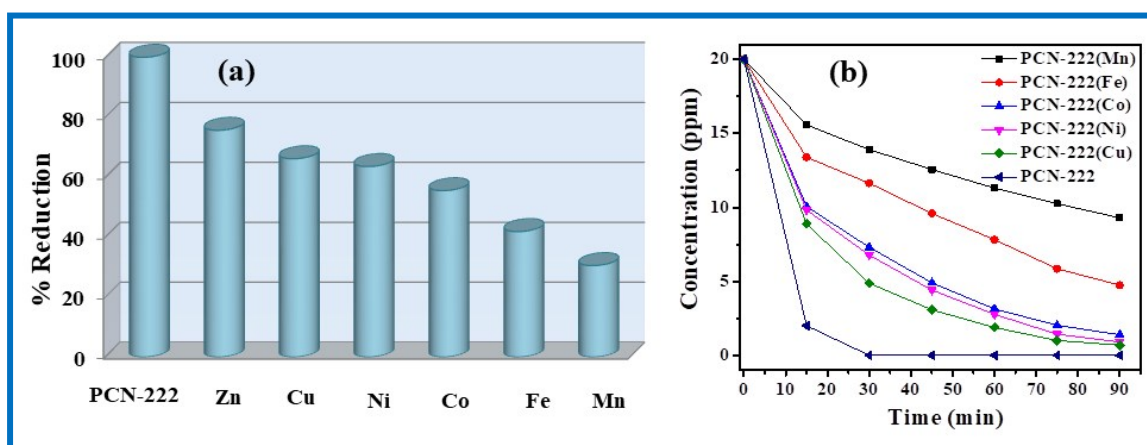

**Fig. S17** (a) Histogram showing photocatalytic reduction of Cr(VI) catalysed by PCN-222 and PCN-222(M) ( $M = \text{Zn}^{\text{II}}$ ,  $\text{Cu}^{\text{II}}$ ,  $\text{Ni}^{\text{II}}$ ,  $\text{Co}^{\text{II}}$ ,  $\text{Fe}^{\text{III}}\text{Cl}$ , and  $\text{Mn}^{\text{III}}\text{Cl}$ ) within 30 min at pH 1, (b) Time-dependent plot for photocatalytic reduction of Cr(VI).

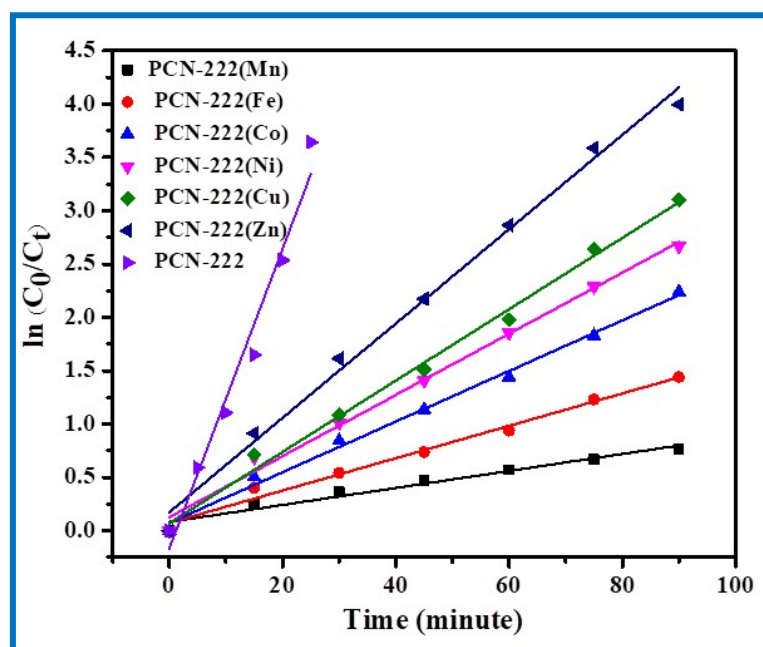

**Fig. S18** Kinetics of photocatalytic reduction of Cr(VI) catalysed by PCN-222 and PCN-222(M) ( $M = \text{Zn}^{\text{II}}$ ,  $\text{Cu}^{\text{II}}$ ,  $\text{Ni}^{\text{II}}$ ,  $\text{Co}^{\text{II}}$ ,  $\text{Fe}^{\text{III}}\text{Cl}$ , and  $\text{Mn}^{\text{III}}\text{Cl}$ ).

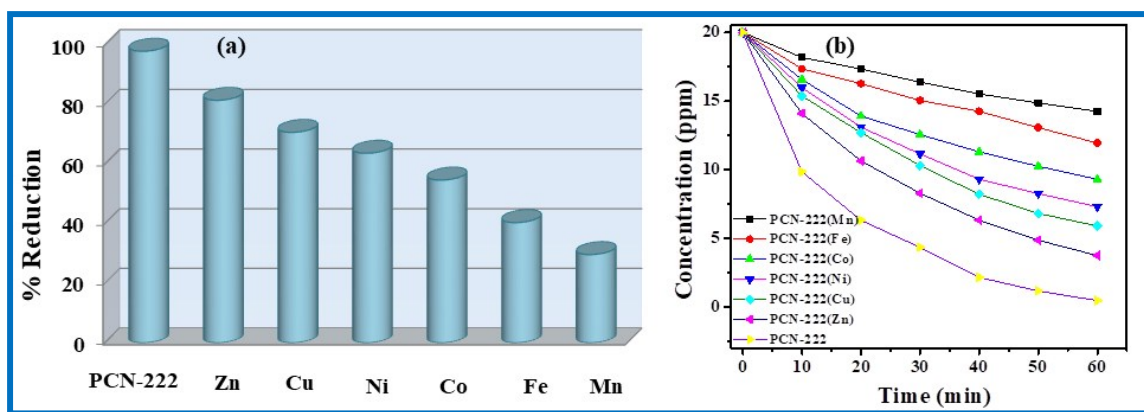

**Fig. S19** (a) Histograms showing % reduction of Cr(VI) catalysed by PCN-222 and PCN-222(M) (M = Zn<sup>II</sup>, Cu<sup>II</sup>, Ni<sup>II</sup>, Co<sup>II</sup>, Fe<sup>III</sup>Cl, and Mn<sup>III</sup>Cl) at pH 2, (b) time-dependent plot for photocatalytic reduction of Cr(VI).

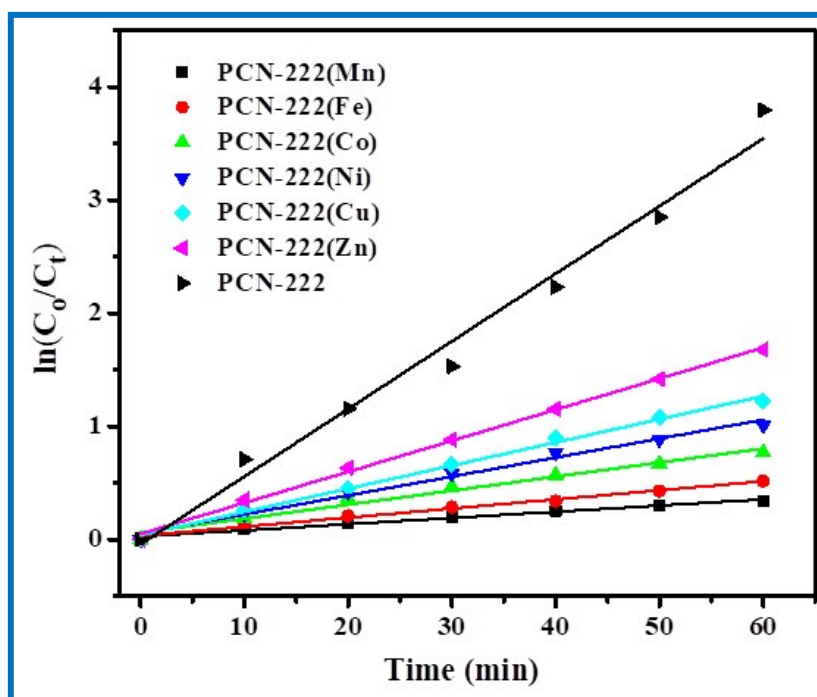

**Fig. S20** Kinetic plots for photo-reduction of Cr(VI) catalysed by PCN-MOFs at pH 2.

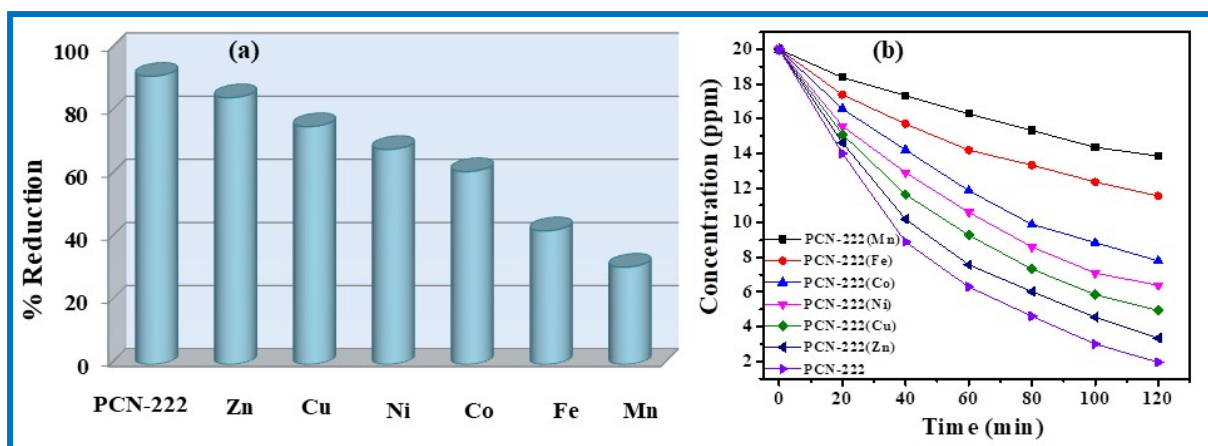

**Fig. S21** (a) Histograms showing % reduction of Cr(VI) catalysed by PCN-222 and PCN-222(M) (M = Zn<sup>II</sup>, Cu<sup>II</sup>, Ni<sup>II</sup>, Co<sup>II</sup>, Fe<sup>III</sup>Cl, and Mn<sup>III</sup>Cl) at pH 3, (b) time-dependent plot for photocatalytic reduction of Cr(VI).

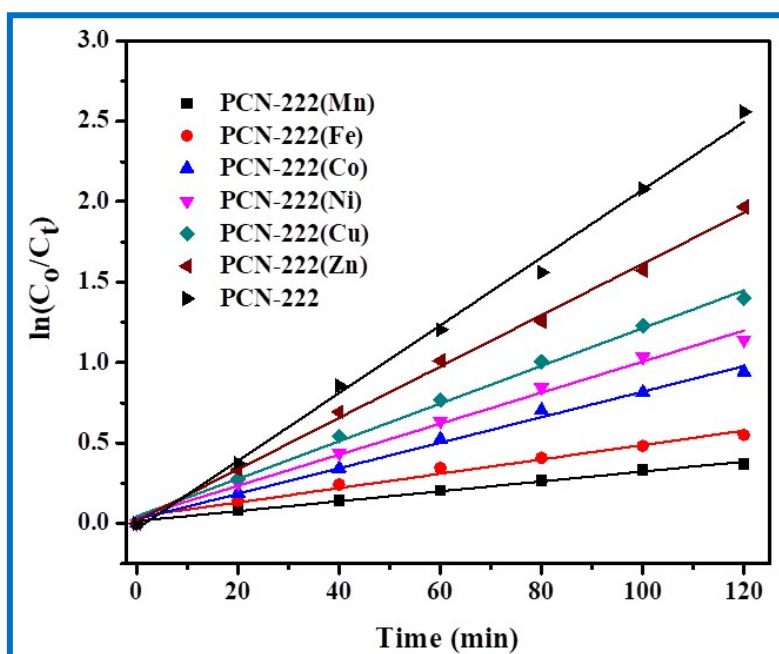

**Fig. S22** Kinetic plots for photo-reduction of Cr(VI) catalysed by PCN-MOFs at pH 3.

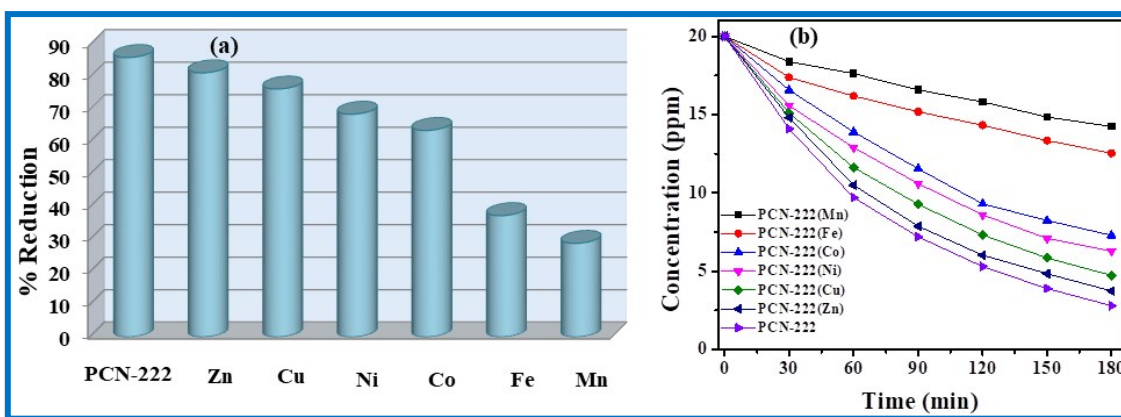

**Fig. S23** (a) Histograms showing % reduction of Cr(VI) catalysed by PCN-222 and PCN-222(M) (M = Zn<sup>II</sup>, Cu<sup>II</sup>, Ni<sup>II</sup>, Co<sup>II</sup>, Fe<sup>III</sup>Cl, and Mn<sup>III</sup>Cl) at pH 4, (b) time-dependent plot for photocatalytic reduction of Cr(VI) catalysed by PCN-MOFs at pH 4.

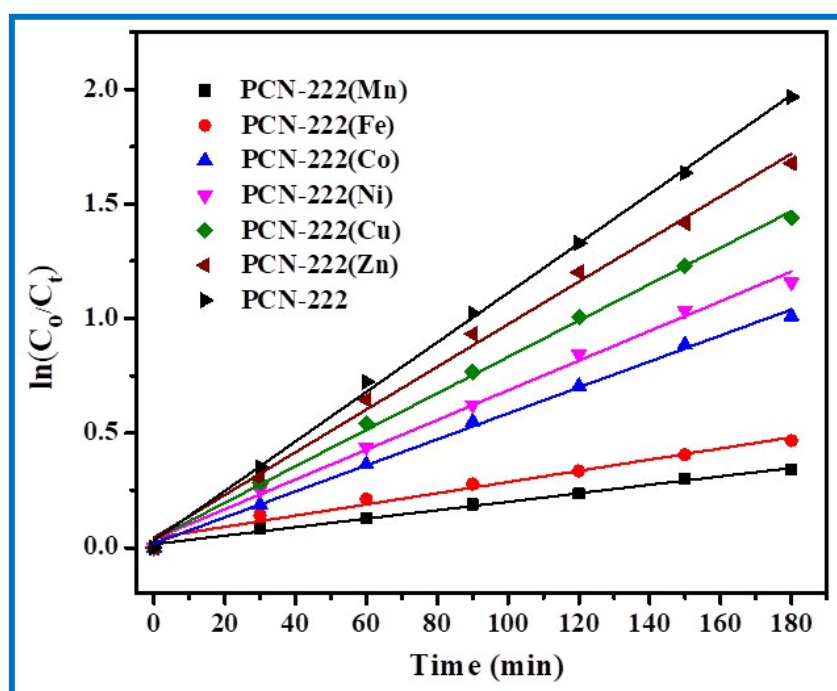

**Fig. S24** Kinetic plots for photoreduction of Cr(VI) catalysed by PCN-MOFs at pH 4.

**Table S2.** Comparison of catalytic reduction of Cr(VI) to Cr(III) using PCN-222 frameworks.

| S. No. | MOF         | pH | Time (min) | % Reduction | k (min <sup>-1</sup> ) |
|--------|-------------|----|------------|-------------|------------------------|
| 1.     | PCN-222     | 1  | 30         | 100         | 0.1289                 |
| 2.     | PCN-222(Zn) | 1  | 30         | 76          | 0.0442                 |
| 3.     | PCN-222(Cu) | 1  | 30         | 66          | 0.0335                 |
| 4.     | PCN-222(Ni) | 1  | 30         | 64          | 0.0288                 |
| 5.     | PCN-222(Co) | 1  | 30         | 56          | 0.0237                 |
| 6.     | PCN-222(Fe) | 1  | 30         | 42          | 0.0151                 |
| 7.     | PCN-222(Mn) | 1  | 30         | 31          | 0.0079                 |
| 8.     | PCN-222     | 2  | 60         | 98          | 0.0598                 |
| 9.     | PCN-222(Zn) | 2  | 60         | 81          | 0.0274                 |
| 10.    | PCN-222(Cu) | 2  | 60         | 71          | 0.0205                 |
| 11.    | PCN-222(Ni) | 2  | 60         | 63          | 0.0167                 |
| 12.    | PCN-222(Co) | 2  | 60         | 55          | 0.0123                 |
| 13.    | PCN-222(Fe) | 2  | 60         | 40.         | 0.0080                 |
| 14.    | PCN-222(Mn) | 2  | 60         | 29          | 0.0054                 |
| 15.    | PCN-222     | 3  | 120        | 91          | 0.0206                 |
| 16.    | PCN-222(Zn) | 3  | 120        | 84          | 0.0159                 |
| 17.    | PCN-222(Cu) | 3  | 120        | 75          | 0.0117                 |
| 18.    | PCN-222(Ni) | 3  | 120        | 68          | 0.0096                 |
| 19.    | PCN-222(Co) | 3  | 120        | 61          | 0.0079                 |
| 20.    | PCN-222(Fe) | 3  | 120        | 42          | 0.0045                 |
| 21.    | PCN-222(Mn) | 3  | 120        | 31          | 0.0033                 |
| 22.    | PCN-222     | 4  | 180        | 86          | 0.0108                 |
| 23.    | PCN-222(Zn) | 4  | 180        | 82          | 0.0093                 |
| 24.    | PCN-222(Cu) | 4  | 180        | 76          | 0.0081                 |
| 25.    | PCN-222(Ni) | 4  | 180        | 68          | 0.0064                 |
| 26.    | PCN-222(Co) | 4  | 180        | 63          | 0.0056                 |
| 27.    | PCN-222(Fe) | 4  | 180        | 37          | 0.0025                 |
| 28.    | PCN-222(Mn) | 4  | 180        | 29          | 0.0018                 |

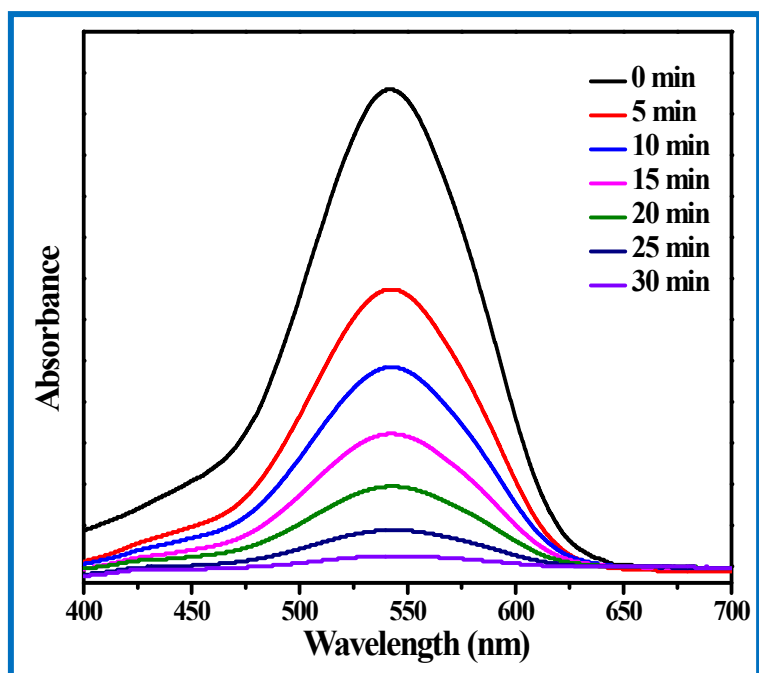

**Fig. S25** Absorption spectra for photocatalytic reduction of Cr(VI) to Cr(III) catalysed by PCN-222 in tap water.

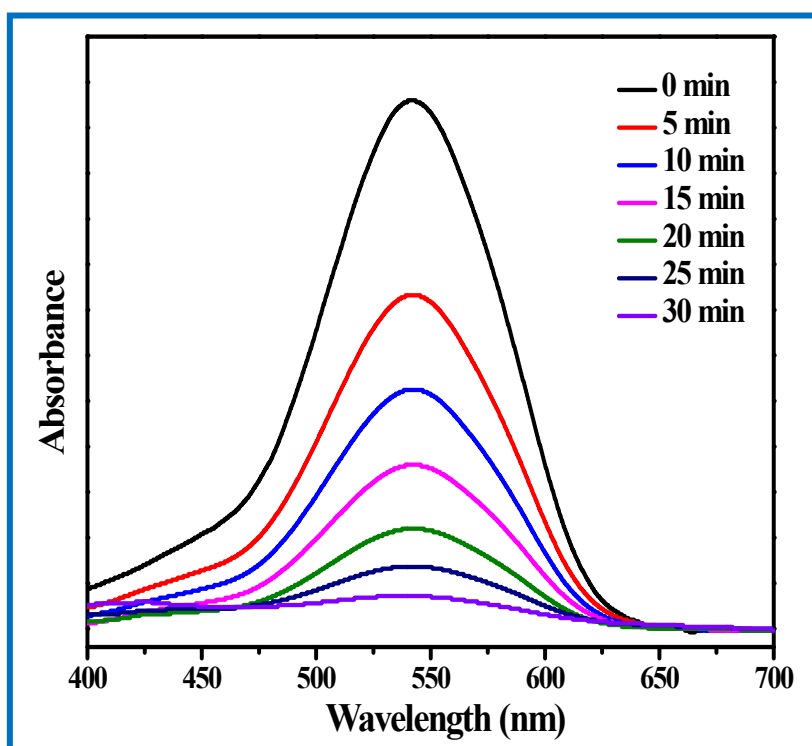

**Fig. S26** Absorption spectra for photocatalytic reduction of Cr(VI) to Cr(III) catalysed by PCN-222 in river water.

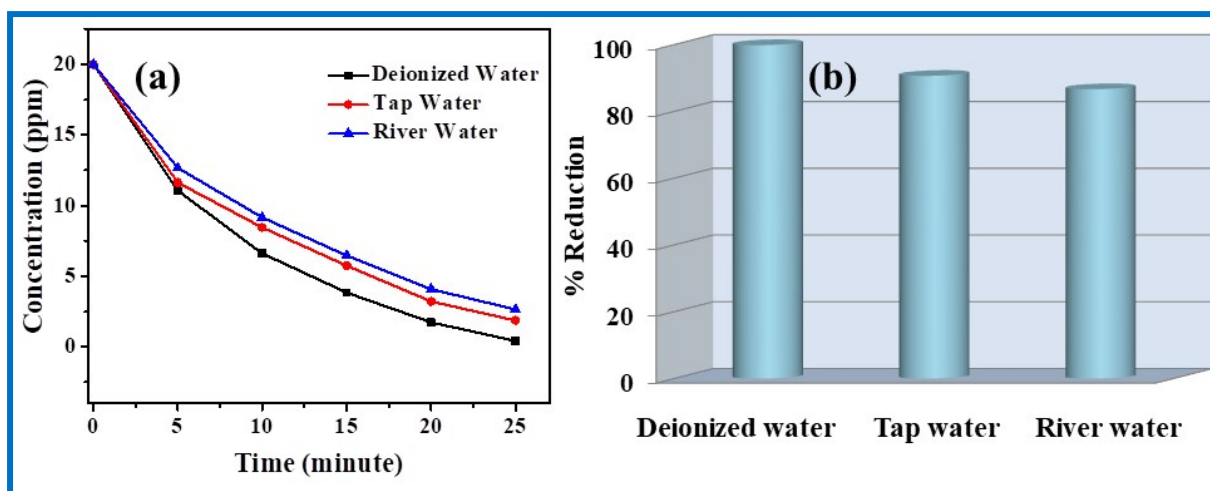

**Fig. S27** (a) Photocatalytic reduction of Cr(VI) to Cr(III) carried out in deionized, tap, and river water, (b) the percentage photocatalytic reduction of Cr(VI) within 25 min.

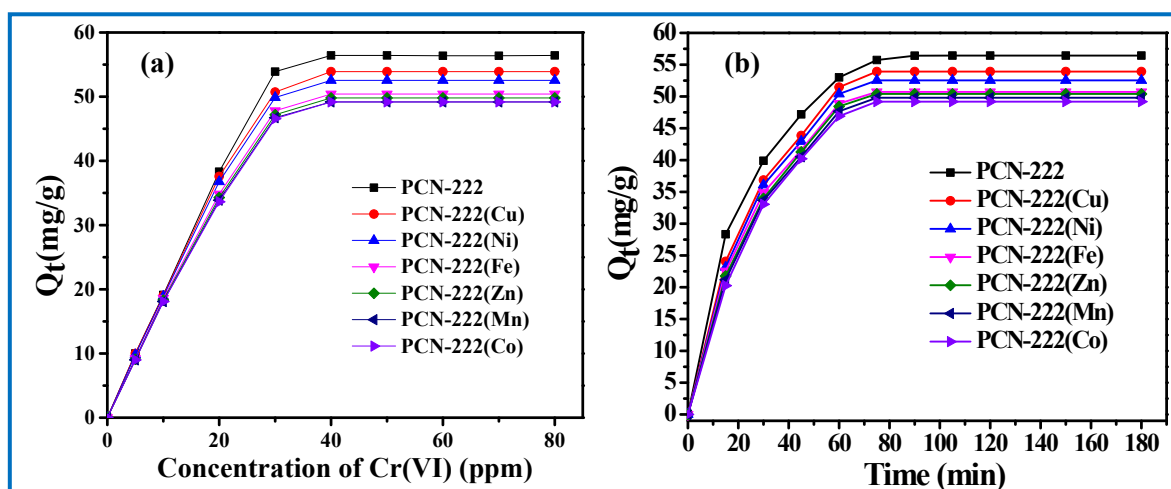

**Fig. S28** (a) Concentration-dependent adsorption of Cr(VI) by PCN-222 and PCN-222(M) (M = Zn<sup>II</sup>, Cu<sup>II</sup>, Ni<sup>II</sup>, Co<sup>II</sup>, Fe<sup>III</sup>Cl, and Mn<sup>III</sup>Cl) carried out under dark conditions, (b) time-dependent adsorption of Cr(VI) carried out with 40 ppm concentration of Cr(VI).

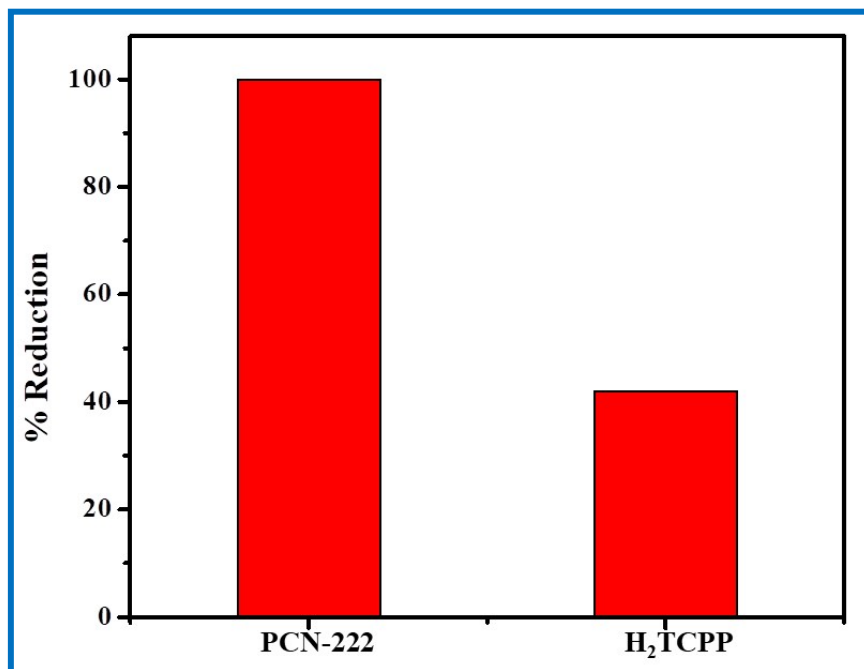

**Fig. S29** Percentage photo-reduction of Cr(VI) catalysed by PCN-222 and H<sub>2</sub>TCPP ligand



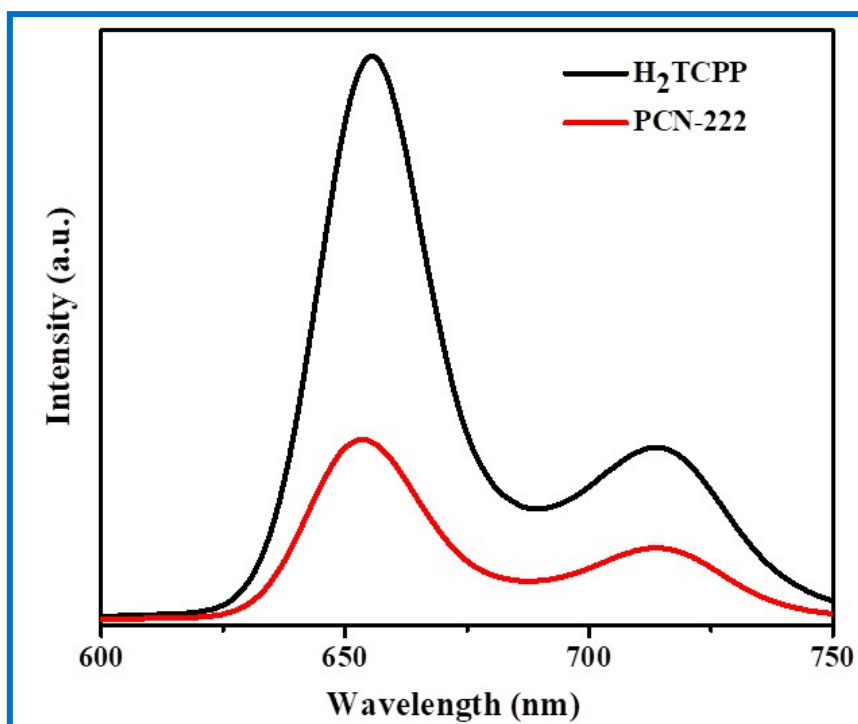

**Fig. S30** Fluorescence spectra of H<sub>2</sub>TCPP ligand and PCN-222 MOF.

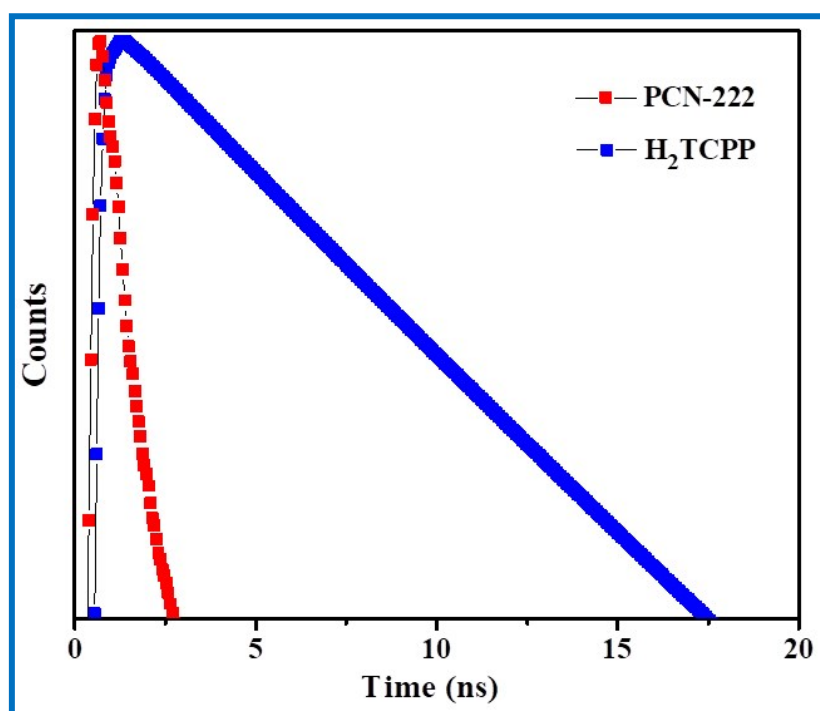

**Fig. S31** Time-resolved fluorescence spectra for H<sub>2</sub>TCPP ligand and PCN-222 MOF recorded with excitation wavelength of 440 nm in water.

**Table S3.** Decay parameters of samples recorded in water with excitation wavelength of 440 nm.

| S. No. | Sample      | $\tau_1$ (ns)   | $\tau_2$ (ns)  | $\tau$ (ns) |
|--------|-------------|-----------------|----------------|-------------|
| 1      | PCN-222     | 0.067 (92.35 %) | 0.961 (7.65 %) | 0.14        |
| 2      | PCN-222(Zn) | 0.062 (97.2 %)  | 1.68 (2.8 %)   | 0.11        |
| 3.     | PCN-222(Cu) | 0.057 (96.28 %) | 0.82 (3.72 %)  | 0.09        |

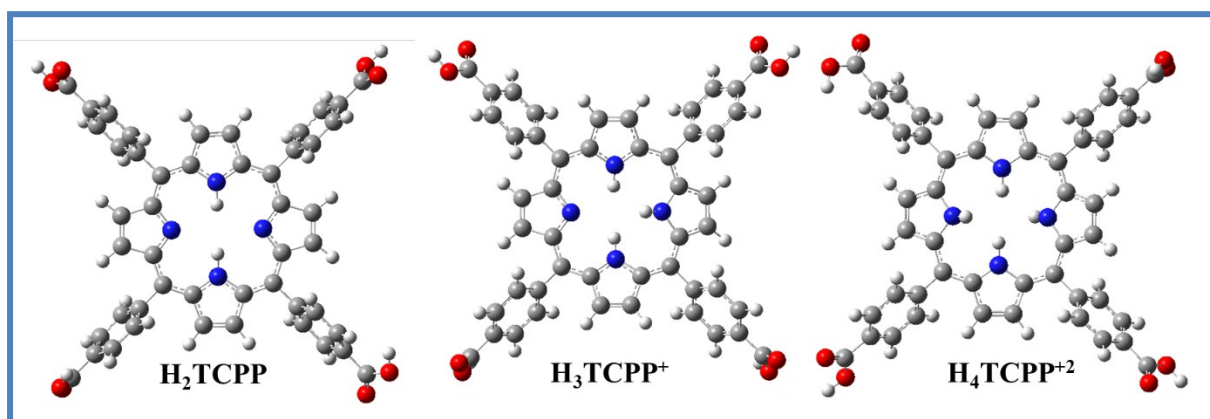

**Fig. S32** Optimized structure of H<sub>2</sub>TCPP, H<sub>3</sub>TCPP<sup>+</sup>, and H<sub>4</sub>TCPP<sup>+2</sup>. Here, white: hydrogen, grey: carbon, blue: nitrogen, red: oxygen.

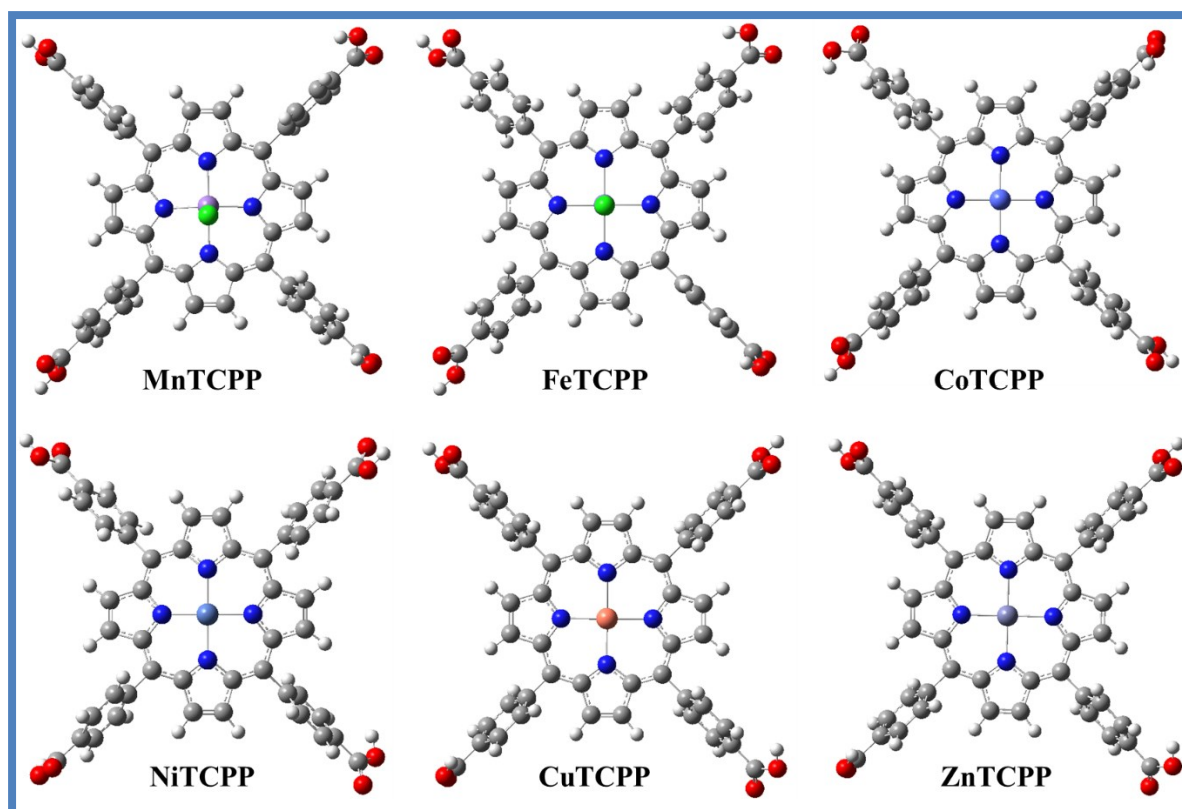

Fig. S33 Optimized structures of porphyrin metal complexes.

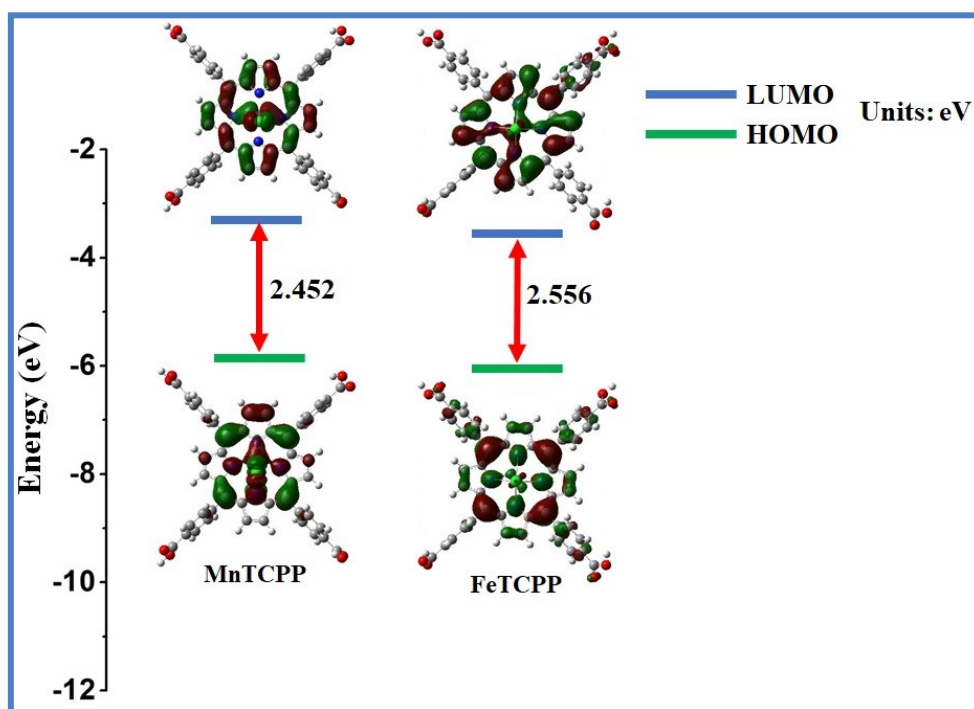

Fig. S34 Bandgaps of optimized FeCl-TCPP and MnCl-TCPP structures.

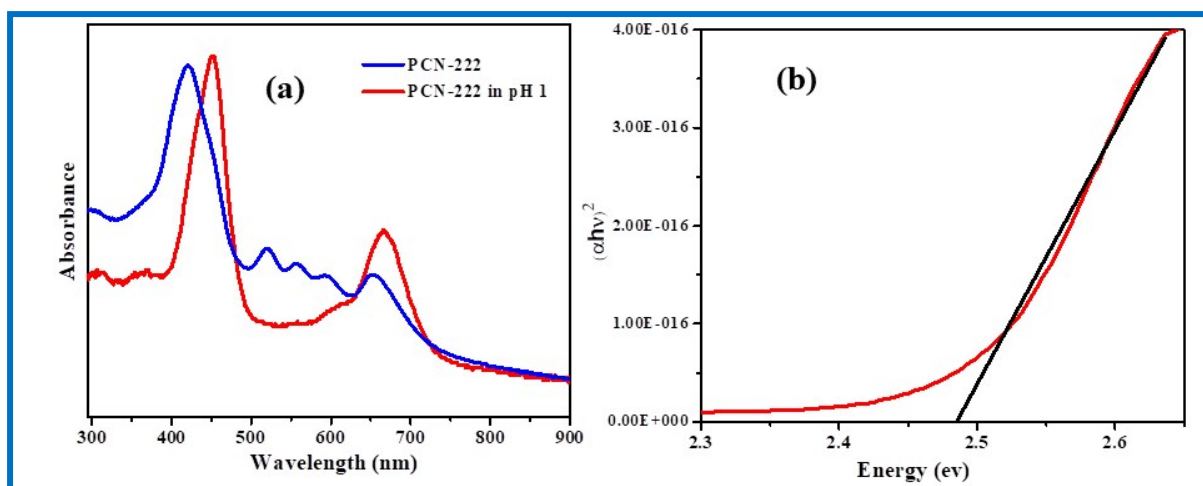

**Fig. S35** (a) Solid state UV-Vis absorption spectra of as synthesized PCN-222 and the isolated sample after soaking in dilute  $\text{H}_2\text{SO}_4$ (pH 1), (b) band gap plot for protonated PCN-222 after treated at pH 1.

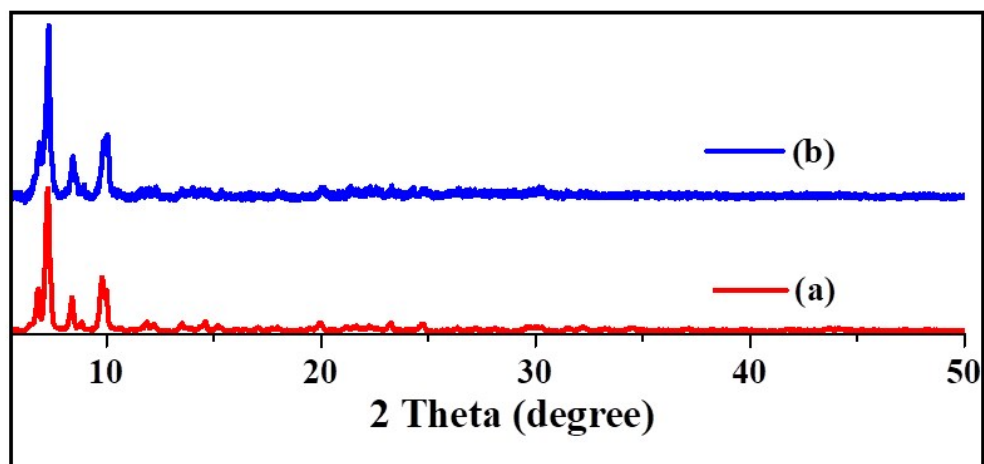

**Fig. S36** PXRD patterns of PCN-222, (a) as-synthesized sample (b) recycled sample after catalysis.

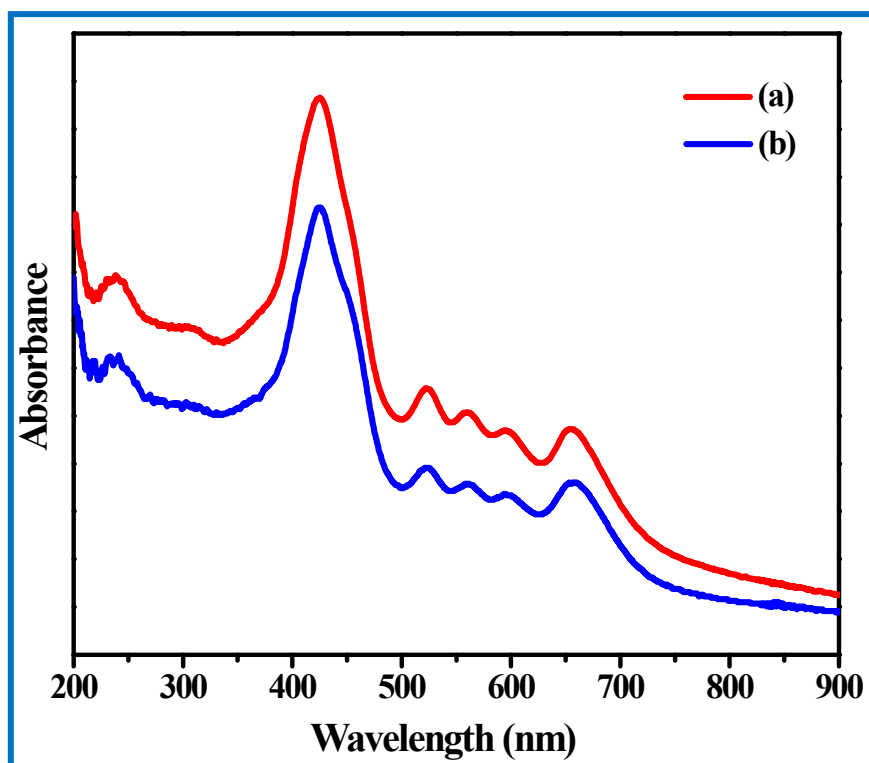

Fig. S37 UV-Vis Spectra of (a) as synthesized PCN-222 and (b) recycled sample after catalysis.

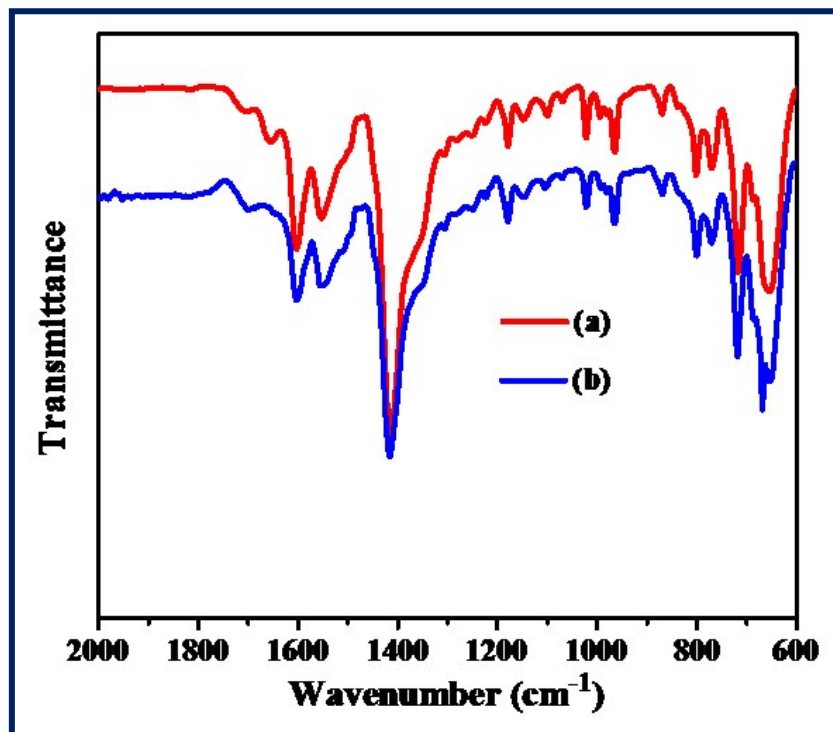

Fig. S38 FT-IR Spectra of (a) as synthesized PCN-222 and (b) recycled sample after catalysis.

### Coordinates of optimized structure of H<sub>2</sub>TCPP:

|   |             |             |             |   |             |             |             |
|---|-------------|-------------|-------------|---|-------------|-------------|-------------|
| O | -6.64595100 | 7.34237500  | 1.07135500  | C | -3.67209600 | 4.32686000  | 1.17711500  |
| N | -2.03788400 | 0.04116200  | -0.03552300 | H | -3.09578500 | 4.12456200  | 2.07354200  |
| O | 7.41623800  | 6.57635400  | 1.01942600  | C | -6.41212200 | 6.66445300  | 0.09942500  |
| C | 4.87948500  | 5.11557100  | -1.15247700 | O | -7.16728800 | -6.81913000 | -1.06028200 |
| H | 5.08365400  | 5.68766200  | -2.04890100 | O | 6.89273600  | 7.00855400  | -1.11933500 |
| C | 2.51326900  | 2.37550500  | 0.00829200  | C | 6.73044300  | 6.34638700  | 0.05211300  |
| C | 5.37830100  | 4.59030200  | 1.15235400  | O | 6.34830500  | -7.60253500 | -0.93932500 |
| H | 5.97240600  | 4.77396200  | 2.03990500  | C | 6.40640800  | -6.71192600 | -0.13709400 |
| O | -7.07905800 | 6.82712200  | -1.06924600 | C | -1.06392000 | 2.90724700  | 0.01364600  |
| N | 2.04173100  | -0.05113700 | 0.03963200  | C | -0.58631900 | 4.25852900  | 0.01382000  |
| N | -0.04496600 | -2.11089200 | -0.00733900 | H | -1.21769600 | 5.13259800  | 0.00859000  |
| H | -0.02219900 | -1.09938800 | -0.00077900 | C | 0.77999300  | 4.22774000  | 0.02109500  |
| N | 0.04866000  | 2.10088700  | 0.00937800  | H | 1.44961800  | 5.07281100  | 0.03378300  |
| H | 0.02577800  | 1.08943700  | 0.00468300  | C | 1.19648200  | 2.85635500  | 0.01083100  |
| O | 7.41916300  | -6.67544000 | 0.77033000  | C | 2.88854200  | 1.01774100  | 0.00536700  |
| C | 5.64033300  | 5.33740600  | -0.00017400 | C | 2.84065400  | -1.15510000 | -0.00724600 |
| C | 1.06790200  | -2.91712800 | -0.01823000 | C | 2.40477900  | -2.49500000 | -0.01841200 |
| O | -7.26307500 | -6.78040300 | 1.15722700  | C | -1.19307900 | -2.86625600 | -0.00725900 |
| C | -6.74727900 | -6.36620000 | -0.03139400 | C | -0.77627700 | -4.23755800 | -0.02435800 |
| C | -5.65460200 | -5.34012600 | 0.03410600  | H | -1.44446700 | -5.08370900 | -0.04156500 |
| C | -5.39219500 | -4.59300100 | -1.11868200 | C | 0.59005100  | -4.26842100 | -0.02175100 |
| H | -5.98820800 | -4.77993900 | -2.00411000 | H | 1.21987000  | -5.14365700 | -0.02275500 |
| C | -4.38661700 | -3.63557600 | -1.12502500 | C | 3.66205000  | -4.34650000 | -1.18514400 |
| H | -4.19802000 | -3.05704400 | -2.02286000 | H | 3.07544500  | -4.15105500 | -2.07635800 |
| C | -3.59764800 | -3.41409500 | 0.01232900  | C | 4.21415200  | -3.83925400 | -1.10208000 |
| C | -3.84516300 | -4.18267900 | 1.15541300  | H | 4.04155000  | -3.26732000 | 2.00722200  |
| H | -3.23768400 | -4.03229300 | 2.04124500  | C | 5.18206200  | -4.83861500 | 1.08944000  |
| C | -4.86266000 | -5.13173600 | 1.16869300  | H | 5.72443000  | -5.04393300 | 2.00841000  |
| H | -4.99792500 | -5.73067600 | 2.06515700  | C | 5.40290100  | -5.59915400 | -0.06435500 |
| C | -2.50948100 | -2.38454600 | 0.00083700  | C | 4.24737100  | -0.77389900 | -0.08325800 |
| C | -2.88524500 | -1.02642100 | 0.00176100  | H | 5.08569000  | -1.44968100 | -0.15572800 |
| C | -4.27374100 | -0.58390900 | 0.07969200  | C | 4.27707300  | 0.57671500  | -0.07477800 |
| H | -5.14152300 | -1.22239500 | 0.14270500  | H | 5.14330700  | 1.21734400  | -0.13720900 |
| C | -4.24340500 | 0.76663800  | 0.08167700  | C | 4.62065900  | -5.35118300 | -1.19667600 |
| H | -5.08091500 | 1.44409800  | 0.14695800  | H | 4.78142600  | -5.95659300 | -2.08089000 |
| C | -2.83645800 | 1.14636800  | 0.00599800  | C | 3.44455300  | -3.57327900 | -0.03629400 |
| C | -2.40114600 | 2.48602600  | 0.01248900  | C | 4.37109800  | 3.63426800  | 1.15242200  |
| C | -3.44128500 | 3.56458900  | 0.02376800  | H | 4.16986900  | 3.06028100  | 2.05047700  |
| C | -4.20254300 | 3.83093100  | -1.12157500 | C | 3.86897600  | 4.16024100  | -1.14590300 |
| H | -4.02908100 | 3.25097400  | -2.02159200 | H | 3.28616800  | 3.98607300  | -2.04405200 |
| C | -5.16794400 | 4.83156600  | -1.11906500 | C | 3.60099300  | 3.40620700  | 0.00375900  |
| H | -5.74714700 | 5.03303900  | -2.01151500 | H | 7.43100600  | -5.83196600 | 1.23937600  |
| C | -5.39223800 | 5.58502200  | 0.03771000  | H | 7.61861700  | 7.63617100  | -0.98627700 |
| C | -4.63830500 | 5.32451900  | 1.18603200  | H | -7.71457200 | 7.54486800  | -0.92974300 |
| H | -4.82528900 | 5.91126600  | 2.07777800  | H | -6.95025800 | -6.22453800 | 1.88160200  |

### Coordinates of optimized structure of H<sub>3</sub>TCPP<sup>+</sup>:

|   |             |             |             |   |             |             |             |
|---|-------------|-------------|-------------|---|-------------|-------------|-------------|
| O | 6.47912700  | 7.53753200  | -0.83973000 | C | 3.44991300  | 4.59606600  | -0.92517200 |
| N | 2.10677600  | 0.02345200  | 0.10244200  | H | 2.66417300  | 4.61497300  | -1.67235900 |
| O | -6.70569500 | 7.32372200  | -0.83250100 | C | 6.48292800  | 6.63880200  | -0.03697200 |
| C | -5.53619900 | 4.39102100  | 0.98433600  | O | 7.28752000  | -6.67253400 | 1.11458000  |
| H | -6.27876000 | 4.37773300  | 1.77203500  | O | -7.51163300 | 6.31951500  | 1.00997800  |
| C | -2.48232100 | 2.41404200  | -0.09316500 | C | -6.63498600 | 6.44632900  | -0.00901400 |
| C | -4.61916400 | 5.41009500  | -1.00626100 | O | -7.05075500 | -6.81725600 | 1.25307400  |
| H | -4.67341900 | 6.18439100  | -1.76233500 | C | -6.54427900 | -6.55226600 | 0.19987900  |
| O | 7.42423800  | 6.50729400  | 0.92115900  | C | 1.09481600  | 2.90166400  | 0.15802400  |
| N | -2.00390600 | -0.01900800 | -0.16223500 | C | 0.61989100  | 4.20754500  | 0.49991000  |
| N | 0.01829000  | -2.12202700 | -0.04799100 | H | 1.25494700  | 5.03583300  | 0.77021500  |
| H | -0.04961000 | -1.17849500 | -0.39982800 | C | -0.74802600 | 4.19487500  | 0.45922500  |
| N | -0.02820700 | 2.12466300  | -0.04475100 | H | -1.41335400 | 5.01195300  | 0.68785200  |
| H | -0.07573800 | 1.17904200  | -0.39412000 | C | -1.17077500 | 2.87906500  | 0.09472800  |
| O | -6.90489500 | -7.21232300 | -0.92759400 | C | -2.83885500 | 1.05954400  | -0.27380800 |
| C | -5.58329000 | 5.38727000  | 0.00488900  | C | -2.81520400 | -1.11508100 | -0.27008300 |
| C | -1.10859800 | -2.89950300 | 0.09683800  | C | -2.42853800 | -2.46122900 | -0.08795800 |
| O | 6.93912100  | -7.18556500 | -1.01747300 | C | 1.15803200  | -2.87522100 | 0.15139300  |
| C | 6.67725600  | -6.47138600 | 0.10322700  | C | 0.71096600  | -4.19023200 | 0.49746800  |
| C | 5.58754800  | -5.43499400 | 0.01094900  | H | 1.36312100  | -5.00404200 | 0.77140400  |
| C | 5.58397200  | -4.41794600 | 0.97080400  | C | -0.65701700 | -4.20576000 | 0.46207600  |
| H | 6.36307200  | -4.41348300 | 1.72359100  | H | -1.30394600 | -5.03525700 | 0.69911600  |
| C | 4.59464400  | -3.44521200 | 0.96256800  | C | -4.43829500 | -3.52263000 | 0.99059000  |

|   |            |             |             |   |             |             |             |
|---|------------|-------------|-------------|---|-------------|-------------|-------------|
| H | 4.60329800 | -2.66463600 | 1.71545600  | H | -4.39561700 | -2.76486800 | 1.76525400  |
| C | 3.56108300 | -3.48349200 | 0.01357600  | C | -3.54744000 | -4.51284900 | -1.02040000 |
| C | 3.55346400 | -4.51813300 | -0.93116300 | H | -2.82045000 | -4.52235400 | -1.82528000 |
| H | 2.76428800 | -4.56429100 | -1.67340100 | C | -4.53886300 | -5.48898700 | -0.97633000 |
| C | 4.55940600 | -5.47925700 | -0.93596200 | H | -4.53596200 | -6.26478000 | -1.73611800 |
| H | 4.50465000 | -6.28088500 | -1.66633600 | C | -5.48247500 | -5.49437300 | 0.05533500  |
| C | 2.49065700 | -2.44476700 | 0.01995300  | C | -4.19331700 | -0.71796100 | -0.53730400 |
| C | 2.89274000 | -1.10747000 | -0.12836000 | H | -5.02220500 | -1.38666700 | -0.70801900 |
| C | 4.15514300 | -0.63823300 | -0.58410200 | C | -4.20780600 | 0.63146300  | -0.54142500 |
| H | 4.95516600 | -1.27535600 | -0.92645000 | H | -5.04988600 | 1.28199400  | -0.71712500 |
| C | 4.14030000 | 0.73391700  | -0.58041000 | C | -5.40944400 | -4.51232600 | 1.04838700  |
| H | 4.92541900 | 1.39094000  | -0.91966100 | H | -6.12155100 | -4.54600500 | 1.86423000  |
| C | 2.86802500 | 1.17299500  | -0.12215400 | C | -3.49131700 | -3.51098600 | -0.04437100 |
| C | 2.43747300 | 2.50062900  | 0.03044900  | C | -3.61461200 | 4.45168700  | -1.03618900 |
| C | 3.48390900 | 3.56275800  | 0.02421300  | H | -2.87690000 | 4.46959400  | -1.83117900 |
| C | 4.52335300 | 3.54093500  | 0.96573400  | C | -4.53719500 | 3.42474100  | 0.94637900  |
| H | 4.55237400 | 2.75802200  | 1.71574200  | H | -4.50009100 | 2.65977700  | 1.71423600  |
| C | 5.50001700 | 4.53018500  | 0.96624000  | C | -3.56382700 | 3.44360200  | -0.06233800 |
| H | 6.29174900 | 4.51582100  | 1.70445100  | H | -6.55098200 | -6.78658600 | -1.71840500 |
| C | 5.45901300 | 5.55277100  | 0.01433200  | H | -8.15619500 | 7.03916800  | 0.93020000  |
| C | 4.43112700 | 5.57789200  | -0.93236400 | H | 8.04550000  | 7.24512700  | 0.82368400  |
| H | 4.41973600 | 6.37235600  | -1.66907700 | H | 6.49977900  | -6.81272800 | -1.79187300 |
|   |            |             |             | H | 1.36750800  | 0.01344000  | 0.79269400  |

### Coordinates of optimized structure of H<sub>4</sub>TCPP<sup>+2</sup>:

|   |             |             |             |   |             |             |             |
|---|-------------|-------------|-------------|---|-------------|-------------|-------------|
| O | 5.87633500  | -7.95832100 | 1.07622800  | H | 2.40196400  | -4.65552400 | 1.86999300  |
| N | 2.08009800  | -0.23274000 | -0.28570400 | C | 5.87498900  | -7.17899100 | 0.15966500  |
| O | -8.30114500 | -5.52839100 | 0.82983500  | O | 7.91827200  | 5.90610800  | -1.14061700 |
| C | -5.25532200 | -4.84914100 | -1.04631300 | O | -7.49062600 | -6.46768800 | -1.05028100 |
| H | -5.39338800 | -5.55550600 | -1.85502300 | C | -7.45063600 | -5.60793000 | -0.01727300 |
| C | -2.76770200 | -2.21127500 | 0.07033800  | O | -5.45648100 | 8.21519600  | -0.81171800 |
| C | -6.05554200 | -3.82645100 | 0.99483400  | C | -5.77040800 | 7.27791800  | -0.13651700 |
| H | -6.81089400 | -3.77108900 | 1.76973500  | C | 0.77006600  | -3.04724000 | -0.08146000 |
| O | 6.71703100  | -7.24183000 | -0.88674700 | C | 0.17270600  | -4.34636200 | -0.02420400 |
| N | -2.09356500 | 0.21166500  | 0.31549800  | H | 0.72015700  | -5.27407700 | -0.05737400 |
| N | 0.26504200  | 2.12224400  | 0.05554700  | C | -1.18243600 | -4.19852000 | 0.09427400  |
| H | 0.17980800  | 1.12932900  | 0.17396100  | H | -1.91241300 | -4.98472000 | 0.19842700  |
| N | -0.27673100 | -2.14460800 | -0.02494700 | C | -1.48884500 | -2.80288000 | 0.06800000  |
| H | -0.19025800 | -1.15072400 | -0.13408900 | C | -3.01546000 | -0.82329500 | 0.04099000  |
| O | -6.90628400 | 7.28636500  | 0.59135700  | C | -2.73351900 | 1.44610500  | 0.07006500  |
| C | -6.21966200 | -4.75223600 | -0.03866600 | C | -2.16005000 | 2.73322500  | 0.11036800  |
| C | -0.78256400 | 3.02444100  | 0.10315800  | C | 1.47720000  | 2.78040500  | -0.04395600 |
| O | 7.84573800  | 6.23454100  | 1.05518200  | C | 1.16922100  | 4.17612200  | -0.08319300 |
| C | 7.39837800  | 5.67417300  | -0.08783500 | H | 1.89759900  | 4.96240700  | -0.19800400 |
| C | 6.20002300  | 4.75787900  | 0.01437700  | C | -0.18552900 | 4.32405400  | 0.03297400  |
| C | 6.01151200  | 3.83818200  | -1.02255100 | H | -0.73296700 | 5.25223000  | 0.05417100  |
| H | 6.73477200  | 3.81051500  | -1.82869800 | C | -3.11342500 | 4.75884100  | -1.05159200 |
| C | 4.91173400  | 2.99361800  | -1.02333700 | H | -2.43565500 | 4.59270900  | -1.88220200 |
| H | 4.77874200  | 2.29002300  | -1.83818200 | C | -4.02183600 | 4.09498800  | 1.08881600  |
| C | 3.94535800  | 3.08189600  | -0.00670800 | H | -4.01946800 | 3.44197300  | 1.95506900  |
| C | 4.12545200  | 4.01801000  | 1.02181300  | C | -4.90169400 | 5.17327100  | 1.04541100  |
| H | 3.40129900  | 4.09100200  | 1.82595100  | H | -5.55374700 | 5.34352600  | 1.89627100  |
| C | 5.24804700  | 4.84012500  | 1.03549000  | C | -4.89984000 | 6.04519700  | -0.04668000 |
| H | 5.34745200  | 5.56689300  | 1.83548800  | C | -4.03807400 | 1.15356700  | -0.39648300 |
| C | 2.75470100  | 2.18922500  | -0.04405300 | H | -4.73627000 | 1.89221500  | -0.75768100 |
| C | 3.00290200  | 0.80107400  | -0.01222000 | C | -4.20690900 | -0.21185500 | -0.41556400 |
| C | 4.19494500  | 0.18939900  | 0.44100500  | H | -5.06237800 | -0.74969700 | -0.79321100 |
| H | 5.05273700  | 0.72615600  | 0.81483800  | C | -3.99382100 | 5.82979400  | -1.09121800 |
| C | 4.02525400  | -1.17609800 | 0.42264600  | H | -3.99132500 | 6.52064300  | -1.92584100 |
| H | 4.72413600  | -1.91556800 | 0.78082500  | C | -3.11213200 | 3.88129100  | 0.04512600  |
| C | 2.72028500  | -1.46786900 | -0.04317200 | C | -4.94100700 | -3.00034700 | 1.02183800  |
| C | 2.14852200  | -2.75611900 | -0.08767400 | H | -4.81519200 | -2.29645300 | 1.83752600  |
| C | 3.10448800  | -3.89885100 | -0.03127300 | C | -4.12925800 | -4.03487900 | -1.01270100 |
| C | 4.04372700  | -4.07204300 | -1.05926600 | H | -3.39913000 | -4.10030600 | -1.81217600 |
| H | 4.05425200  | -3.39254300 | -1.90488400 | C | -3.95810300 | -3.10153500 | 0.02249700  |
| C | 4.94186100  | -5.13322300 | -1.02124000 | H | -7.12393600 | 6.41675900  | 0.94977900  |
| H | 5.65269300  | -5.27514600 | -1.82531700 | H | -8.30608300 | -6.98875100 | -0.98068100 |
| C | 4.92731000  | -6.02186400 | 0.05669800  | H | 7.29858700  | -8.00850200 | -0.76317900 |
| C | 4.00618700  | -5.84403200 | 1.09305600  | H | 7.45744100  | 5.83302500  | 1.84269600  |
| H | 4.02222500  | -6.53442200 | 1.92812800  | H | 1.51964300  | -0.14484300 | -1.12682600 |
| C | 3.09686900  | -4.79651900 | 1.04904700  | H | -1.53478400 | 0.12522600  | 1.15781200  |

### Coordinates of optimized structure of CoTCPP:

|   |             |             |             |    |             |             |             |
|---|-------------|-------------|-------------|----|-------------|-------------|-------------|
| O | 6.30027800  | -7.75565300 | -0.28956300 | H  | 3.10019400  | -4.47301300 | 1.48544000  |
| N | 1.96752900  | -0.16769100 | -0.01517000 | C  | 5.95552900  | -6.95246300 | -1.16380400 |
| O | -7.61472300 | -5.93346200 | 2.38767300  | O  | 7.48621400  | 6.56250800  | 0.34017200  |
| C | -5.28225000 | -4.87900900 | -0.23735400 | O  | -7.39216700 | -6.60411000 | 0.21612300  |
| H | -5.64555000 | -5.51423000 | -1.03074500 | C  | -7.02476600 | -5.83621300 | 1.30566800  |
| C | -2.60761600 | -2.22517600 | 0.33482900  | O  | -5.63014300 | 7.80431400  | -2.33645300 |
| C | -5.43052200 | -4.10262600 | 2.05479000  | C  | -5.82404100 | 7.01673500  | -1.41643900 |
| H | -5.91004800 | -4.15552700 | 3.02180500  | C  | 0.86104400  | -2.91389100 | -0.16695300 |
| O | 6.45538100  | -7.03342000 | -2.45031000 | C  | 0.32594400  | -4.25398300 | -0.09766500 |
| N | -1.96863500 | 0.15228900  | 0.01402800  | H  | 0.90031800  | -5.15424100 | -0.21797900 |
| N | 0.15849900  | 1.95622400  | -0.00327600 | C  | -1.00314700 | -4.14472700 | 0.16465600  |
| N | -0.16024100 | -1.98053600 | 0.01257700  | H  | -1.71317500 | -4.93928300 | 0.30347400  |
| O | -6.94113300 | 7.18970700  | -0.60809700 | C  | -1.31769900 | -2.73528600 | 0.20585300  |
| C | -5.89538700 | -4.93183500 | 1.02329700  | C  | -2.89973900 | -0.86984200 | 0.19152300  |
| C | -0.85933200 | 2.88751600  | -0.20449400 | C  | -2.72434500 | 1.30474100  | -0.20494900 |
| O | 7.40777900  | 6.13421900  | 2.55264100  | C  | -2.21439200 | 2.59361800  | -0.34695000 |
| C | 6.95318400  | 5.94148700  | 1.25363900  | C  | 1.31324100  | 2.71141500  | 0.19809600  |
| C | 5.83767600  | 4.97489200  | 1.06418200  | C  | 1.00262400  | 4.12064300  | 0.13241300  |
| C | 5.64426300  | 4.43335500  | -0.21515000 | H  | 1.71638100  | 4.91548600  | 0.25245600  |
| H | 6.31205600  | 4.73286700  | -1.01004900 | C  | -0.32649000 | 4.22846100  | -0.13226000 |
| C | 4.60793400  | 3.53435600  | -0.45135500 | H  | -0.90219100 | 5.12822800  | -0.25196700 |
| H | 4.46905600  | 3.11999300  | -1.44028500 | C  | -3.19715100 | 4.35217000  | -1.86156500 |
| C | 3.72619900  | 3.16660000  | 0.57928700  | H  | -2.54072800 | 4.00112900  | -2.64562700 |
| C | 3.90649300  | 3.73204200  | 1.85095900  | C  | -4.01645600 | 4.19907600  | 0.40490200  |
| H | 3.22395500  | 3.47248400  | 2.64828800  | H  | -3.97966000 | 3.74751700  | 1.38654200  |
| C | 4.95023300  | 4.62436600  | 2.09326100  | C  | -4.89147900 | 5.25651900  | 0.16050300  |
| H | 5.03663100  | 5.06760700  | 3.07765200  | H  | -5.50108100 | 5.62476100  | 0.97645200  |
| C | 2.60377800  | 2.20369900  | 0.33159800  | C  | -4.93309800 | 5.86689300  | -1.10285000 |
| C | 2.90006400  | 0.85030700  | 0.18597800  | C  | -4.13262800 | 0.98307200  | -0.19047000 |
| C | 4.23924600  | 0.30949400  | 0.15291500  | H  | -4.92781900 | 1.68485600  | -0.36381000 |
| H | 5.13864700  | 0.87851800  | 0.30255400  | C  | -4.24063200 | -0.34500600 | 0.07883300  |
| C | 4.13072200  | -1.02075000 | -0.10504400 | H  | -5.13887400 | -0.92925600 | 0.16321700  |
| H | 4.92327900  | -1.74076300 | -0.19906800 | C  | -4.06518300 | 5.41249300  | -2.10640900 |
| C | 2.72159900  | -1.32660600 | -0.19307100 | H  | -4.08594900 | 5.90245200  | -3.06918700 |
| C | 2.21496200  | -2.61917500 | -0.31270400 | C  | -3.16237100 | 3.72583600  | -0.60390600 |
| C | 3.18159400  | -3.74319400 | -0.53887600 | C  | -4.36816500 | -3.23225700 | 1.82792200  |
| C | 3.76138400  | -3.93390000 | -1.80383200 | H  | -4.01057500 | -2.59670500 | 2.62619700  |
| H | 3.49642100  | -3.26744200 | -2.61304000 | C  | -4.21760400 | -4.00742300 | -0.45799200 |
| C | 4.66409500  | -4.97214400 | -2.02667400 | H  | -3.75210800 | -3.96250800 | -1.43289300 |
| H | 5.10332000  | -5.11808800 | -3.00170500 | C  | -3.74504900 | -3.17376600 | 0.56949500  |
| C | 5.00588200  | -5.84008400 | -0.97928100 | H  | -7.11173500 | 6.43809900  | -0.01368800 |
| C | 4.43442600  | -5.65475100 | 0.28856300  | H  | -8.14103800 | -7.18279100 | 0.45451000  |
| H | 4.71071100  | -6.32771100 | 1.08773700  | H  | 7.07586000  | -7.78357000 | -2.51936000 |
| C | 3.53221400  | -4.61715400 | 0.50481100  | H  | 7.05291800  | 5.48836000  | 3.18856000  |
|   |             |             |             | Co | -0.00073600 | -0.01048900 | 0.00194000  |

### Coordinates of optimized structure of CuTCPP:

|   |             |             |             |   |             |             |             |
|---|-------------|-------------|-------------|---|-------------|-------------|-------------|
| O | -6.29143900 | 7.62444400  | 1.07571600  | C | -6.05925800 | 6.96434700  | 0.09118000  |
| N | -2.00929700 | 0.13442500  | -0.02379600 | O | -7.42541000 | -6.51713400 | -1.04255500 |
| O | 7.64692700  | 6.27302100  | 1.05481500  | O | 7.21277900  | 6.65766900  | -1.11277100 |
| C | 5.11949400  | 4.85303500  | -1.15498100 | C | 6.98288400  | 6.04199300  | 0.07262700  |
| H | 5.37705800  | 5.38679200  | -2.06124700 | O | 5.98181900  | -7.86571700 | -0.98788300 |
| C | 2.59846600  | 2.25808600  | 0.00942800  | C | 6.05069700  | -7.00993400 | -0.14941400 |
| C | 5.51882400  | 4.38400100  | 1.18115000  | C | -0.89820600 | 2.90754000  | 0.00774400  |
| H | 6.09110100  | 4.57133600  | 2.08218700  | C | -0.38409300 | 4.25503600  | 0.00607800  |
| O | -6.67840600 | 7.19480200  | -1.09237000 | H | -0.98420400 | 5.15141900  | -0.00019800 |
| N | 2.01186400  | -0.14316900 | 0.02203100  | C | 0.96817700  | 4.16181400  | 0.01309000  |
| N | -0.13765200 | -2.01537000 | -0.00986900 | H | 1.68503400  | 4.96791200  | 0.02405000  |
| N | 0.14024300  | 2.00646300  | 0.00427100  | C | 1.29266200  | 2.75644400  | 0.00534700  |
| O | 7.02606800  | -7.05892500 | 0.79756300  | C | 2.91234300  | 0.89597300  | 0.00854400  |
| C | 5.85141200  | 5.07998700  | 0.01498000  | C | 2.76157200  | -1.29507200 | -0.00739700 |
| C | 0.90111600  | -2.91616700 | -0.02600400 | C | 2.26299900  | -2.60091400 | -0.02291100 |
| O | -7.55039800 | -6.42829400 | 1.17202600  | C | -1.29015600 | -2.76530300 | -0.00750400 |
| C | -6.99980000 | -6.06222500 | -0.01679900 | C | -0.96529200 | -4.17051600 | -0.02897600 |
| C | -5.86464500 | -5.08309300 | 0.04440600  | H | -1.68063300 | -4.97786300 | -0.04557400 |
| C | -5.55123600 | -4.37533200 | -1.12032200 | C | 0.38705200  | -4.26365900 | -0.03209500 |
| H | -6.13993100 | -4.55765100 | -2.01160800 | H | 0.98562400  | -5.16110900 | -0.03848700 |
| C | -4.50497300 | -3.46237700 | -1.13075700 | C | 3.46993100  | -4.47153200 | -1.20884100 |
| H | -4.27607000 | -2.91486100 | -2.03872100 | H | 2.92579400  | -4.21674600 | -2.11193000 |
| C | -3.72663100 | -3.24756200 | 0.01489200  | C | 3.95659500  | -4.07535000 | 1.11455700  |



|   |             |             |             |    |             |             |             |
|---|-------------|-------------|-------------|----|-------------|-------------|-------------|
| C | -4.02641200 | -3.97702900 | 1.17080500  | H  | 3.77706500  | -3.52826100 | 2.03370700  |
| H | -3.42557800 | -3.83383300 | 2.06232200  | C  | 4.87352100  | -5.12191100 | 1.10058100  |
| C | -5.08321000 | -4.88197000 | 1.18761600  | H  | 5.36845700  | -5.38746500 | 2.03085000  |
| H | -5.25781600 | -5.45441100 | 2.09456800  | C  | 5.10108200  | -5.85099400 | -0.07199300 |
| C | -2.59583200 | -2.26614500 | 0.00134300  | C  | 4.16614500  | -0.96965700 | -0.04903400 |
| C | -2.91013700 | -0.90365000 | 0.00048900  | H  | 4.97202500  | -1.68528700 | -0.09704000 |
| C | -4.25646900 | -0.38877100 | 0.05167800  | C  | 4.25914300  | 0.38273400  | -0.03845000 |
| H | -5.15272000 | -0.98748500 | 0.09634900  | H  | 5.15421300  | 0.98383000  | -0.07470400 |
| C | -4.16282100 | 0.96353900  | 0.05012600  | C  | 4.37640800  | -5.52351800 | -1.15273200 |
| H | -4.96752800 | 1.68074600  | 0.09339200  | H  | 4.53973800  | -6.10585400 | -2.12144800 |
| C | -2.75838400 | 1.28744700  | 0.00015100  | C  | 3.24688300  | -3.72993000 | -0.04072500 |
| C | -2.26033700 | 2.59331300  | 0.00490600  | C  | 4.47026300  | 3.47334000  | 1.17711600  |
| C | -3.24472300 | 3.72240200  | 0.01414000  | H  | 4.21378300  | 2.93964700  | 2.08598600  |
| C | -3.95251500 | 4.06038400  | -1.14601300 | C  | 4.06856100  | 3.94231100  | -1.15273300 |
| H | -3.77742500 | 3.49950800  | -2.05783700 | H  | 3.50599200  | 3.76571700  | -2.06321600 |
| C | -4.86722100 | 5.10781000  | -1.14346500 | C  | 3.72942200  | 3.24038600  | 0.01066100  |
| H | -5.40550100 | 5.36447100  | -2.04730800 | H  | 7.05915800  | -6.23560300 | 1.30017200  |
| C | -5.09261000 | 5.83709700  | 0.02839200  | H  | 7.96104400  | 7.25723600  | -0.97458300 |
| C | -4.39093100 | 5.50554600  | 1.19149400  | H  | -7.28103300 | 7.93996900  | -0.95081400 |
| H | -4.57698900 | 6.07583200  | 2.09405200  | H  | -7.22246200 | -5.87258000 | 1.88977900  |
| C | -3.47612400 | 4.46058300  | 1.18263800  | H  | -2.93793200 | 4.20513400  | 2.08912700  |
|   |             |             |             | Cu | 0.00125100  | -0.00417700 | -0.00203900 |

### Coordinates of optimized structure of FeTCPP:

|   |             |             |             |    |             |             |             |
|---|-------------|-------------|-------------|----|-------------|-------------|-------------|
| O | -7.90715400 | 6.01156800  | 0.78348500  | C  | -7.29577800 | 5.65500400  | -0.22958500 |
| N | -1.98581400 | -0.26235000 | -0.12100500 | O  | -5.62633700 | -8.22547700 | -0.65549600 |
| O | 6.24929300  | 7.61878100  | 1.34334500  | O  | 5.84370700  | 7.96608600  | -0.87704700 |
| C | 4.14108100  | 5.79549300  | -1.03811000 | C  | 5.67150500  | 7.27296400  | 0.30691300  |
| H | 4.34365900  | 6.39401100  | -1.91309800 | O  | 7.42185400  | -6.54251600 | -1.26824200 |
| C | 2.11260400  | 2.72639500  | -0.05662800 | C  | 7.28851100  | -5.70543700 | -0.38155500 |
| C | 4.49809800  | 5.34773200  | 1.31846000  | C  | -1.46211100 | 2.65360100  | -0.19717300 |
| H | 4.97432500  | 5.61578200  | 2.25078100  | C  | -1.21496000 | 4.06933500  | -0.16639100 |
| O | -7.66129900 | 6.10513700  | -1.48485900 | H  | -1.97962400 | 4.82449300  | -0.16446600 |
| N | 1.98678500  | 0.25362000  | -0.10657300 | C  | 0.13366400  | 4.24590900  | -0.10782400 |
| N | 0.25255600  | -1.95703400 | -0.23493300 | H  | 0.67250500  | 5.17367800  | -0.04655400 |
| N | -0.24933600 | 1.95092700  | -0.19401100 | C  | 0.73945200  | 2.94143800  | -0.12543600 |
| O | 8.25359800  | -5.62183100 | 0.61477400  | C  | 2.68475200  | 1.45916700  | -0.06610000 |
| C | 4.75469600  | 6.12525800  | 0.17949400  | C  | 2.97071800  | -0.73150900 | -0.16250600 |
| C | 1.46495800  | -2.65904700 | -0.24886700 | C  | 2.73988800  | -2.09933700 | -0.22970300 |
| O | -6.54567200 | -7.42017900 | 1.24035400  | C  | -0.73764400 | -2.94912200 | -0.17651600 |
| C | -5.64443000 | -7.33326900 | 0.18608900  | C  | -0.13042600 | -4.25310800 | -0.17947800 |
| C | -4.75348300 | -6.14141100 | 0.15408500  | H  | -0.66686500 | -5.18271900 | -0.13349600 |
| C | -4.14710500 | -5.80438500 | -1.06527600 | C  | 1.21807400  | -4.07514000 | -0.22842300 |
| H | -4.35662200 | -6.41342400 | -1.93273700 | H  | 1.98192000  | -4.83093400 | -0.23257000 |
| C | -3.29750200 | -4.70471700 | -1.15086400 | C  | 4.30492300  | -3.66550600 | -1.44536500 |
| H | -2.84767200 | -4.44494300 | -2.09912000 | H  | 3.74310800  | -3.48498500 | -2.35136400 |
| C | -3.02096500 | -3.92299900 | -0.01696500 | C  | 4.65482300  | -3.27251900 | 0.91352500  |
| C | -3.60926400 | -4.27689400 | 1.20700400  | H  | 4.35395400  | -2.80423400 | 1.84046400  |
| H | -3.38286900 | -3.69845600 | 2.09173600  | C  | 5.75421000  | -4.12986000 | 0.89233200  |
| C | -4.46428300 | -5.37447800 | 1.29322800  | H  | 6.26990400  | -4.33358800 | 1.82261400  |
| H | -4.86456800 | -5.64403900 | 2.26264900  | C  | 6.14374500  | -4.75714300 | -0.30133100 |
| C | -2.11050900 | -2.73448100 | -0.10129200 | C  | 4.28437400  | -0.12875100 | -0.16494600 |
| C | -2.68420200 | -1.46549100 | -0.09418800 | H  | 5.21107700  | -0.67015200 | -0.22062700 |
| C | -4.10894000 | -1.21921800 | -0.12409500 | C  | 4.10850300  | 1.21629500  | -0.10319400 |
| H | -4.86407400 | -1.98339700 | -0.12954400 | H  | 4.86156000  | 1.98286100  | -0.09942000 |
| C | -4.28225700 | 0.12669900  | -0.17203600 | C  | 5.39902100  | -4.52607900 | -1.46719200 |
| H | -5.20650500 | 0.67330000  | -0.21857100 | H  | 5.69170100  | -5.03050200 | -2.37679300 |
| C | -2.96719900 | 0.72508700  | -0.15859900 | C  | 3.92062700  | -3.02418000 | -0.25606900 |
| C | -2.73586000 | 2.09397900  | -0.19355000 | C  | 3.64250900  | 4.25221100  | 1.23997300  |
| C | -3.91909900 | 3.01884700  | -0.21404200 | H  | 3.44371300  | 3.65601800  | 2.11970100  |
| C | -4.39188800 | 3.54149900  | -1.42773000 | C  | 3.28271600  | 4.69970600  | -1.11097700 |
| H | -3.89788400 | 3.27247400  | -2.35138400 | H  | 2.81657600  | 4.44311700  | -2.05245600 |
| C | -5.49063400 | 4.39902100  | -1.45174300 | C  | 3.02391200  | 3.91496000  | 0.02435200  |
| H | -5.85560900 | 4.79936900  | -2.38516600 | H  | 8.16152000  | -4.83558900 | 1.18121300  |
| C | -6.13259300 | 4.74864200  | -0.25454900 | H  | 6.45885900  | 8.71119000  | -0.73907700 |
| C | -5.66387400 | 4.23030800  | 0.96193200  | H  | -8.42921200 | 6.70327100  | -1.41286200 |
| H | -6.16693600 | 4.50999700  | 1.87659800  | H  | -6.60679800 | -6.60547200 | 1.76934300  |
| C | -4.56687100 | 3.37270200  | 0.98045300  | Fe | 0.00548200  | -0.00490500 | 0.04516600  |
| H | -4.20513700 | 2.97430600  | 1.91824200  | Cl | -0.04016000 | -0.04362700 | 2.28468000  |

### Coordinates of optimized structure of MnTCPP:

|   |             |             |             |    |             |             |             |
|---|-------------|-------------|-------------|----|-------------|-------------|-------------|
| O | -6.94277400 | -7.06646800 | 0.97484800  | C  | -6.28782200 | -6.75292000 | -0.02515300 |
| N | 0.09105000  | -2.01632400 | -0.04396500 | O  | 7.37767700  | -6.59637700 | -1.20168100 |
| O | -7.23169100 | 6.81985400  | 0.93829400  | O  | -7.39040100 | 6.46478200  | -1.31218100 |
| C | -5.33565400 | 4.61762400  | -1.29695500 | C  | -6.82882300 | 6.23116100  | -0.07094500 |
| H | -5.82987000 | 4.87293100  | -2.22187900 | O  | 7.08462600  | 6.90625800  | -1.20846800 |
| C | -2.53006700 | 2.35800200  | -0.06164800 | C  | 6.31004100  | 6.78270500  | -0.26555300 |
| C | -5.09692800 | 4.91176000  | 1.09835600  | C  | -2.74876700 | -1.22948500 | -0.20793400 |
| H | -5.42146400 | 5.39384700  | 2.00939400  | C  | -4.12837800 | -0.85385900 | -0.31781100 |
| O | -6.46165700 | -7.40419200 | -1.23196900 | H  | -4.95028000 | -1.54382700 | -0.37540200 |
| N | -0.08661000 | 2.03594200  | 0.09736600  | C  | -4.18563400 | 0.50840400  | -0.30350000 |
| N | 1.94131500  | 0.09291800  | -0.19891700 | H  | -5.06393100 | 1.12642600  | -0.33768600 |
| N | -1.93887700 | -0.07687900 | -0.17009600 | C  | -2.84067800 | 1.00109300  | -0.20066400 |
| O | 6.38983700  | 7.67951200  | 0.79163500  | C  | -1.23349600 | 2.83348300  | 0.08250900  |
| C | -5.73985900 | 5.23716900  | -0.10513600 | C  | 0.98540300  | 2.93031100  | 0.06308500  |
| C | 2.74368200  | 1.24596400  | -0.24786900 | C  | 2.31592800  | 2.56938300  | -0.10212100 |
| O | 7.30643700  | -6.72751300 | 1.04761700  | C  | 2.84854200  | -0.98414100 | -0.24746100 |
| C | 6.85473100  | -6.21314000 | -0.16049700 | C  | 4.18753400  | -0.48873400 | -0.38623800 |
| C | 5.74647700  | -5.22041800 | -0.10429200 | H  | 5.06614700  | -1.10281400 | -0.46353200 |
| C | 5.00152100  | -5.00099800 | -1.27213500 | C  | 4.12473500  | 0.87334200  | -0.37700900 |
| H | 5.25477200  | -5.56215100 | -2.16000800 | H  | 4.94498600  | 1.56526900  | -0.43382800 |
| C | 3.96206200  | -4.07474900 | -1.28210300 | C  | 3.93126600  | 4.06679100  | -1.34361000 |
| H | 3.38840400  | -3.91787900 | -2.18515400 | H  | 3.63201200  | 3.58783100  | -2.26572200 |
| C | 3.65415000  | -3.33131900 | -0.13094800 | C  | 3.74617900  | 4.28950100  | 1.05532700  |
| C | 4.41608100  | -3.53522400 | 1.02949900  | H  | 3.32104700  | 3.96771700  | 1.99591100  |
| H | 4.19608200  | -2.95957100 | 1.91775300  | C  | 4.69830900  | 5.30814000  | 1.03424800  |
| C | 5.45070900  | -4.46997600 | 1.04410600  | H  | 5.01578300  | 5.74015300  | 1.97520500  |
| H | 6.04108200  | -4.57536300 | 1.94583700  | C  | 5.26984200  | 5.72109000  | -0.17913200 |
| C | 2.53244800  | -2.33460400 | -0.13607400 | C  | 0.49484800  | 4.28998800  | 0.09243500  |
| C | 1.22754200  | -2.80819300 | -0.02649000 | H  | 1.11433900  | 5.16811200  | 0.06977100  |
| C | 0.86644600  | -4.20962400 | 0.05849000  | C  | -0.86277700 | 4.23079900  | 0.10371100  |
| H | 1.56345000  | -5.02669200 | 0.10167400  | H  | -1.55687900 | 5.05135900  | 0.09288700  |
| C | -0.48990900 | -4.26887800 | 0.06387500  | C  | 4.88656300  | 5.07917300  | -1.36592500 |
| H | -1.11444500 | -5.14229900 | 0.11258100  | H  | 5.34775100  | 5.38792900  | -2.29291700 |
| C | -0.97211200 | -2.90448500 | -0.01603600 | C  | 3.34620200  | 3.65937600  | -0.13302200 |
| C | -2.31461000 | -2.54780000 | -0.10978100 | C  | -4.06273300 | 3.97983700  | 1.11007300  |
| C | -3.34484700 | -3.63947200 | -0.10275400 | H  | -3.57347900 | 3.72597000  | 2.04024300  |
| C | -3.61564300 | -4.37499000 | -1.26762900 | C  | -4.30073300 | 3.68441500  | -1.27990800 |
| H | -3.07856200 | -4.14558000 | -2.17778100 | H  | -3.98587700 | 3.21260100  | -2.20062000 |
| C | -4.57053300 | -5.39044600 | -1.26192600 | C  | -3.65145200 | 3.35413800  | -0.07903100 |
| H | -4.77992700 | -5.95269400 | -2.15912800 | H  | 5.64570400  | 7.61655800  | -1.41584100 |
| C | -5.26943100 | -5.68752100 | -0.08273500 | H  | -8.10295900 | 7.12739100  | -1.23630100 |
| C | -5.00189000 | -4.95817400 | 1.08530100  | H  | -7.14257900 | -8.09751900 | -1.14144200 |
| H | -5.54550700 | -5.20075400 | 1.98714500  | H  | 6.73943400  | -6.50178500 | 1.80586700  |
| C | -4.04904900 | -3.94307600 | 1.07430000  | Mn | 0.00193000  | 0.06202900  | 0.23582200  |
| H | -3.84109800 | -3.38524200 | 1.97676400  | Cl | 0.04273800  | -0.35797900 | 2.43892600  |

### Coordinates of optimized structure of NiTCPP:

|   |             |             |             |   |             |             |             |
|---|-------------|-------------|-------------|---|-------------|-------------|-------------|
| O | 6.77591800  | 7.10307800  | 1.28331600  | H | 3.41448400  | 4.36250600  | -0.98593500 |
| N | 1.92314000  | -0.00701600 | -0.01092000 | C | 6.36243900  | 6.24867600  | 2.03027700  |
| O | -6.24319200 | 6.89620500  | -3.18625300 | O | 6.59990500  | -7.26649000 | -1.29006500 |
| C | -5.30774600 | 4.77261600  | -0.37528900 | O | -7.13682200 | 6.69794200  | -1.13750400 |
| H | -6.05950300 | 5.09941900  | 0.33226000  | C | -6.23496900 | 6.37534900  | -2.09656400 |
| C | -2.38703300 | 2.34224800  | -0.53484900 | O | -6.60940600 | -6.53318700 | 3.22177200  |
| C | -4.28889600 | 4.91894700  | -2.56088700 | C | -6.41850400 | -6.26325800 | 2.06820500  |
| H | -4.26892500 | 5.36252900  | -3.54944700 | C | 1.02736500  | 2.75946100  | 0.32409700  |
| O | 6.81349700  | 6.12457600  | 3.30229900  | C | 0.59516400  | 4.13222600  | 0.29293800  |
| N | -1.94929700 | -0.01960700 | 0.00125300  | H | 1.20746800  | 4.98334300  | 0.54598200  |
| N | -0.00314300 | -1.95672300 | 0.00864300  | C | -0.69209300 | 4.12936600  | -0.13093200 |
| N | -0.01517000 | 1.92199900  | -0.01064400 | H | -1.34306300 | 4.97635800  | -0.28172200 |
| O | -7.15795800 | -6.86193300 | 1.09592700  | C | -1.07661600 | 2.75128900  | -0.29099000 |
| C | -5.26835300 | 5.33625400  | -1.65481000 | C | -2.78678400 | 1.02369700  | -0.33138900 |
| C | -1.05134000 | -2.79390600 | 0.32248200  | C | -2.77851800 | -1.08165300 | 0.27979300  |
| O | 7.13305700  | -6.09026800 | -3.09572100 | C | -2.36999500 | -2.39216600 | 0.52047900  |
| C | 6.40321800  | -6.29471300 | -1.96615200 | C | 1.05748100  | -2.78807800 | -0.27708000 |
| C | 5.37170200  | -5.25566700 | -1.63845400 | C | 0.66075900  | -4.16642400 | -0.15422400 |
| C | 4.91107400  | -5.18862500 | -0.31955100 | H | 1.29892100  | -5.01678100 | -0.33697100 |
| H | 5.32596900  | -5.87410400 | 0.40999000  | C | -0.62724500 | -4.16882900 | 0.26737200  |
| C | 3.94627600  | -4.25836700 | 0.04388200  | H | -1.24656600 | -5.02178100 | 0.49620000  |
| H | 3.61154800  | -4.20184000 | 1.07406300  | C | -3.94862000 | -3.41511700 | 2.18352200  |
| C | 3.39891000  | -3.38416300 | -0.90515500 | H | -3.59909100 | -2.69153600 | 2.91206500  |

|   |            |             |             |    |             |             |             |
|---|------------|-------------|-------------|----|-------------|-------------|-------------|
| C | 3.84653500 | -3.46793300 | -2.22778500 | C  | -3.86194700 | -4.35241500 | -0.03187400 |
| H | 3.41818400 | -2.81197000 | -2.97782900 | H  | -3.44857600 | -4.36241500 | -1.03446000 |
| C | 4.82150500 | -4.39189600 | -2.59167000 | C  | -4.84107600 | -5.27565900 | 0.32135400  |
| H | 5.10744800 | -4.45581100 | -3.63795300 | H  | -5.14099100 | -6.01674000 | -0.41453300 |
| C | 2.36306500 | -2.37331400 | -0.52717000 | C  | -5.38460200 | -5.27665500 | 1.61093600  |
| C | 2.75915500 | -1.05239400 | -0.33217700 | C  | -4.15668000 | -0.69650900 | 0.12156900  |
| C | 4.13485700 | -0.63433900 | -0.25989900 | H  | -5.00422700 | -1.34659800 | 0.27363200  |
| H | 4.98663400 | -1.26254800 | -0.46979700 | C  | -4.15968400 | 0.59104500  | -0.30106600 |
| C | 4.13215100 | 0.65419000  | 0.16051900  | H  | -5.01081700 | 1.20354600  | -0.55329500 |
| H | 4.98023900 | 1.29639800  | 0.34019200  | C  | -4.91434800 | -4.34620500 | 2.54275800  |
| C | 2.75359900 | 1.04906600  | 0.28863400  | H  | -5.31802500 | -4.36970600 | 3.54807600  |
| C | 2.34500200 | 2.35890000  | 0.53271600  | C  | -3.40532500 | -3.40515800 | 0.89176300  |
| C | 3.37512500 | 3.36907400  | 0.92377800  | C  | -3.36301800 | 3.95116000  | -2.19365700 |
| C | 3.92725100 | 3.34384500  | 2.21079700  | H  | -2.60686600 | 3.62971900  | -2.90174100 |
| H | 3.58892500 | 2.59569000  | 2.91956600  | C  | -4.38069400 | 3.80182400  | -0.01343200 |
| C | 4.89377200 | 4.26865100  | 2.59037600  | H  | -4.40724700 | 3.37677100  | 0.98405300  |
| H | 5.30953100 | 4.24419700  | 3.58987900  | C  | -3.39806600 | 3.37478000  | -0.91652400 |
| C | 5.33120500 | 5.23682800  | 1.68115300  | H  | -7.01066300 | -6.43898300 | 0.24094200  |
| C | 4.78998800 | 5.26531400  | 0.39207000  | H  | -7.71583600 | 7.37591400  | -1.51643400 |
| H | 5.14275900 | 6.01540800  | -0.30607600 | H  | 7.47398300  | 6.82115600  | 3.43289000  |
| C | 3.82239400 | 4.34190900  | 0.01882700  | H  | 6.98337200  | -5.20413100 | -3.44779500 |
|   |            |             |             | Ni | -0.01160100 | -0.01562900 | -0.00309300 |

### Coordinates of optimized structure of ZnTCPP:

|   |             |             |             |    |             |             |             |
|---|-------------|-------------|-------------|----|-------------|-------------|-------------|
| O | -6.33059500 | 7.60335900  | 1.09177600  | H  | -2.92489000 | 4.22872300  | 2.08002800  |
| N | -2.04295400 | 0.12197000  | -0.03578900 | C  | -6.11674500 | 6.92837200  | 0.11315300  |
| O | 7.64000700  | 6.30868100  | 1.01456700  | O  | -7.40720900 | -6.55271200 | -1.05976100 |
| C | 5.06237900  | 4.92378900  | -1.15931300 | O  | 7.14440000  | 6.74171100  | -1.13057100 |
| H | 5.29189100  | 5.48058100  | -2.05925200 | C  | 6.95094600  | 6.09612800  | 0.04547900  |
| C | 2.59014100  | 2.28283600  | 0.00949500  | O  | 6.03025600  | -7.84745200 | -0.95568700 |
| C | 5.52869700  | 4.40114000  | 1.15264800  | C  | 6.11132000  | -6.97310600 | -0.13765500 |
| H | 6.12388400  | 4.57090600  | 2.04226200  | C  | -0.92198200 | 2.92459700  | 0.01147100  |
| O | -6.76683300 | 7.13348400  | -1.05851100 | C  | -0.41388000 | 4.27687200  | 0.01098400  |
| N | 2.04568800  | -0.13144100 | 0.03645600  | H  | -1.01539300 | 5.17250400  | 0.00522500  |
| N | -0.12540200 | -2.04942100 | -0.00736800 | C  | 0.94141200  | 4.19306900  | 0.01633800  |
| N | 0.12809700  | 2.03988500  | 0.00630900  | H  | 1.64807300  | 5.00828800  | 0.02852500  |
| O | 7.10875800  | -6.99411100 | 0.78721500  | C  | 1.27928400  | 2.78844800  | 0.00678200  |
| C | 5.82474900  | 5.12776400  | -0.00465500 | C  | 2.92958000  | 0.91938000  | 0.01150100  |
| C | 0.92499600  | -2.93395400 | -0.01865700 | C  | 2.79374900  | -1.28207400 | 0.00081200  |
| O | -7.49945700 | -6.50815900 | 1.15773400  | C  | 2.28818100  | -2.59302100 | -0.01338400 |
| C | -6.96937100 | -6.11475100 | -0.03173200 | C  | -1.27672100 | -2.79789600 | -0.00854300 |
| C | -5.83933900 | -5.13007200 | 0.03192500  | C  | -0.93847600 | -4.20244100 | -0.02670800 |
| C | -5.54741800 | -4.39768200 | -1.12312500 | H  | -1.64360300 | -5.01887900 | -0.04576100 |
| H | -6.14811100 | -4.56633800 | -2.00908400 | C  | 0.41686200  | -4.28623200 | -0.02426300 |
| C | -4.50703300 | -3.47814100 | -1.13108900 | H  | 1.01683300  | -5.18295800 | -0.02562100 |
| H | -4.29512500 | -2.91201800 | -2.03171900 | C  | 3.48201100  | -4.48107700 | -1.18755300 |
| C | -3.71199800 | -3.28070100 | 0.00649500  | H  | 2.91451800  | -4.25072700 | -2.08277600 |
| C | -3.99075200 | -4.03489800 | 1.15210000  | C  | 4.02275600  | -4.02896200 | 1.11319900  |
| H | -3.37835200 | -3.90504300 | 2.03774700  | H  | 3.86126100  | -3.46348700 | 2.02451600  |
| C | -5.04197400 | -4.94624600 | 1.16703500  | C  | 4.94796000  | -5.06809000 | 1.09961700  |
| H | -5.19984100 | -5.53678200 | 2.06544000  | H  | 5.46761500  | -5.30895200 | 2.02314500  |
| C | -2.58737600 | -2.29154700 | -0.00521700 | C  | 5.15325200  | -5.82120700 | -0.06183700 |
| C | -2.92727200 | -0.92772700 | -0.00740500 | C  | 4.19714500  | -0.94329600 | -0.05482100 |
| C | -4.27812200 | -0.41903600 | 0.05322100  | H  | 5.01152000  | -1.64886400 | -0.11134000 |
| H | -5.17313900 | -1.01945800 | 0.10376000  | C  | 4.28069300  | 0.41207100  | -0.04796700 |
| C | -4.19389600 | 0.93623400  | 0.05546100  | H  | 5.17438500  | 1.01464000  | -0.09656600 |
| H | -5.00728400 | 1.64319600  | 0.10800400  | C  | 4.39748900  | -5.52512100 | -1.20062100 |
| C | -2.79046900 | 1.27367300  | -0.00259800 | H  | 4.54440000  | -6.12518300 | -2.09088600 |
| C | -2.28541100 | 2.58458100  | 0.00725800  | C  | 3.28077400  | -3.71483700 | -0.03108400 |
| C | -3.27828800 | 3.70660200  | 0.02188200  | C  | 4.48668400  | 3.48311700  | 1.15480800  |
| C | -4.01852500 | 4.01904500  | -1.12549900 | H  | 4.25884100  | 2.92628600  | 2.05739100  |
| H | -3.86181400 | 3.44403800  | -2.03183200 | C  | 4.01762700  | 4.00620500  | -1.15043300 |
| C | -4.94093200 | 5.05953700  | -1.11836500 | H  | 3.43219900  | 3.84752000  | -2.04971300 |
| H | -5.50326200 | 5.29641600  | -2.01293000 | C  | 3.71454100  | 3.27306300  | 0.00405300  |
| C | -5.14296600 | 5.80773600  | 0.04581500  | H  | 7.14578900  | -6.16027100 | 1.27186100  |
| C | -4.40972800 | 5.50181900  | 1.19641600  | H  | 7.89219100  | 7.34315600  | -0.99815100 |
| H | -4.57817400 | 6.08590400  | 2.09360300  | H  | -7.37195800 | 7.87616600  | -0.91462500 |
| C | -3.48676400 | 4.46421900  | 1.18256200  | H  | -7.16394200 | -5.96477700 | 1.88138800  |
|   |             |             |             | Zn | 0.00140500  | -0.00430100 | -0.00073000 |

## References

---

1. D. Feng, Z. -Y. Gu, J. -R. Li, H. -L. Jiang, Z. Wei and H. -C. Zhou, *Angew. Chem. Int. Ed.*, 2012, **51**, 10307-10310.
2. B. J. Deibert, and J. Li, *Chem. Commun.* 2014, **50**, 9636-9639.
3. (a) L. J. Shen, W. M. Wu, R. W. Liang, R. Lin and L. Wu, *Nanoscale*, 2013, **5**, 9374-9382; (b) L. J. Shen, S. J. Liang, W. M. Wu, R. W. Liang and L. Wu, *Dalton Trans.*, 2013, **42**, 13649-13657; (c) W. Huang, N. Liua, X. Zhanga, M. Wub, and L. Tang, *Applied Surface Science*, 2017, **425**, 107–116; (d) H. Zhao, Q. Xia, H. Xing, D. Chen and H. Wang, *ACS Sustainable Chem. Eng.*, 2017, **5**, 4449–4456 (e) L. Shi , T. Wang , H. Zhang , K. Chang , X. Meng, H. Liu and J. Ye, *Adv. Sci.*, 2015, **2**, 1500006; (f) L. W. Wang, T. Y. Zeng, G. Y. Liao, Q. G. Cheng and Zhiquan Pan, *Polyhedron*, 2019, **157**, 152-162; (g) D.-M. Chen, C.-X. Sun, C. S. Liu and M. Du, *Inorg. Chem.*, 2018, **57**, 7975-7981.
